# Supplementary material
Source: Springer Nature journal article supplement (https://www.springermedizin.de/resource/supplementary/12872_2006_118_MOESM2_ESM.pdf/9431054)

# Hourly Poincaré Plots for CHF patients

This file contains the hourly Poincaré plots of all the CHF patients the data on whom was used in the study by Thakre and Smith. All the plots are plotted on a square representing 0.5 to 1.5 seconds on both axes. The x-axis represents the current beat while the y-axis represents the next beat. The identifier for the patient is in the box representing the hour 24 at the bottom of each page.

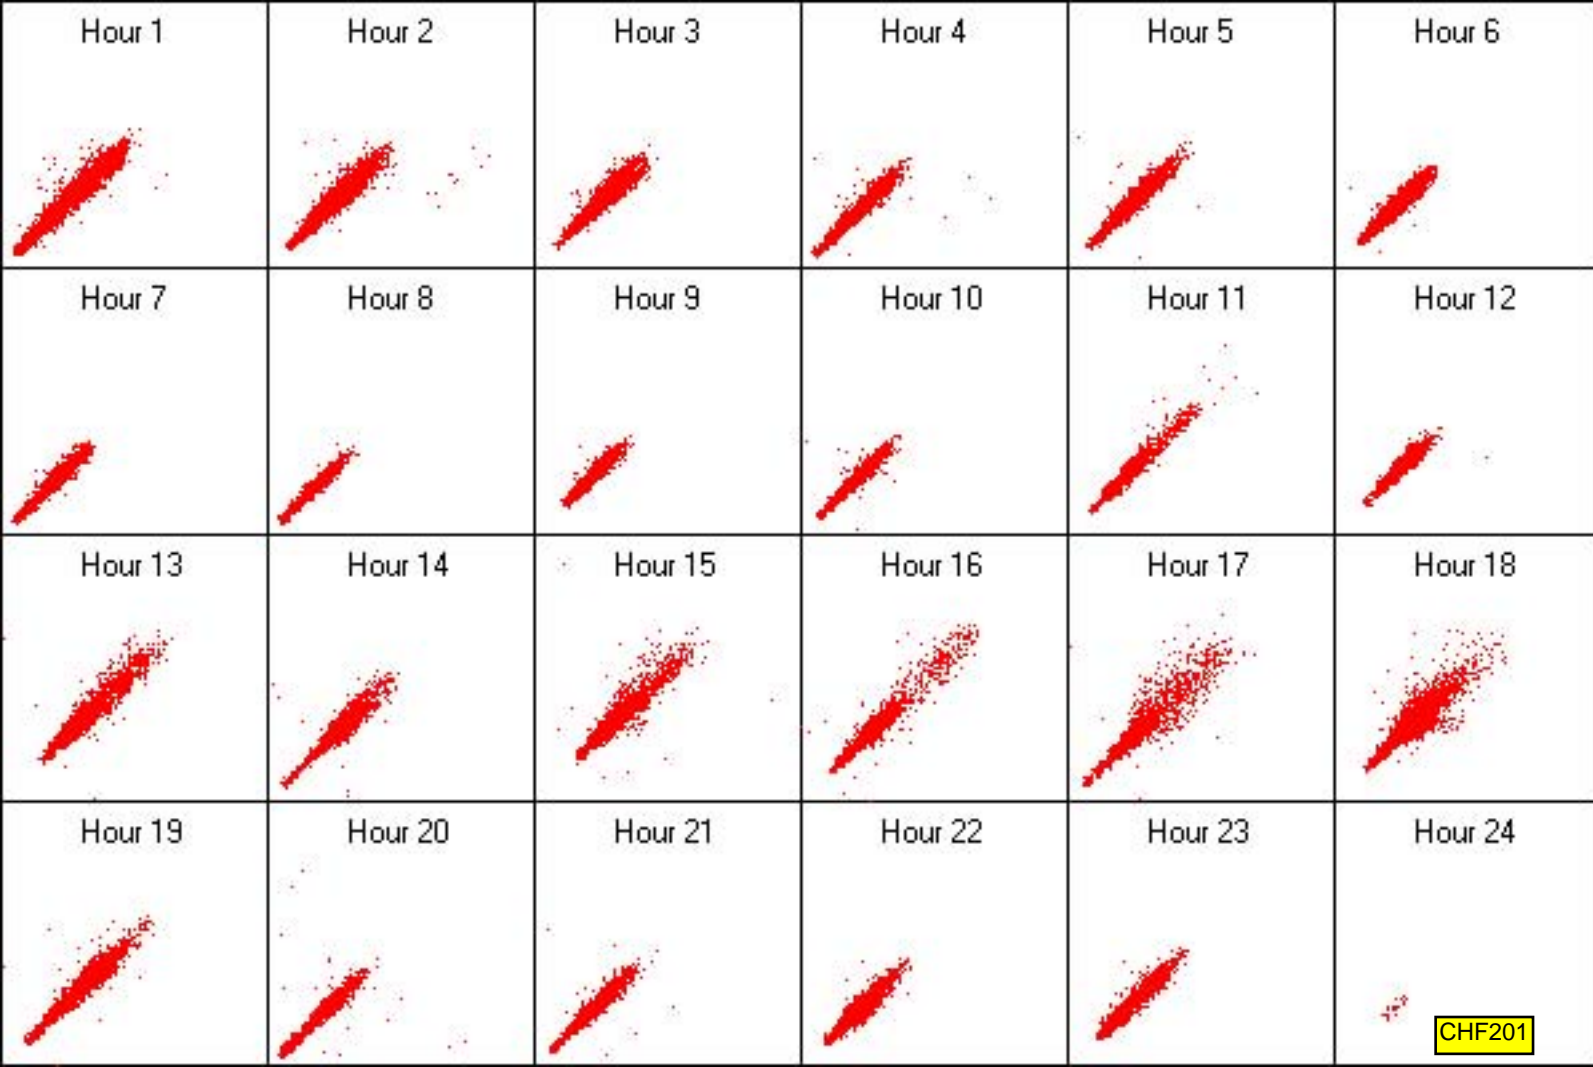

CHF201

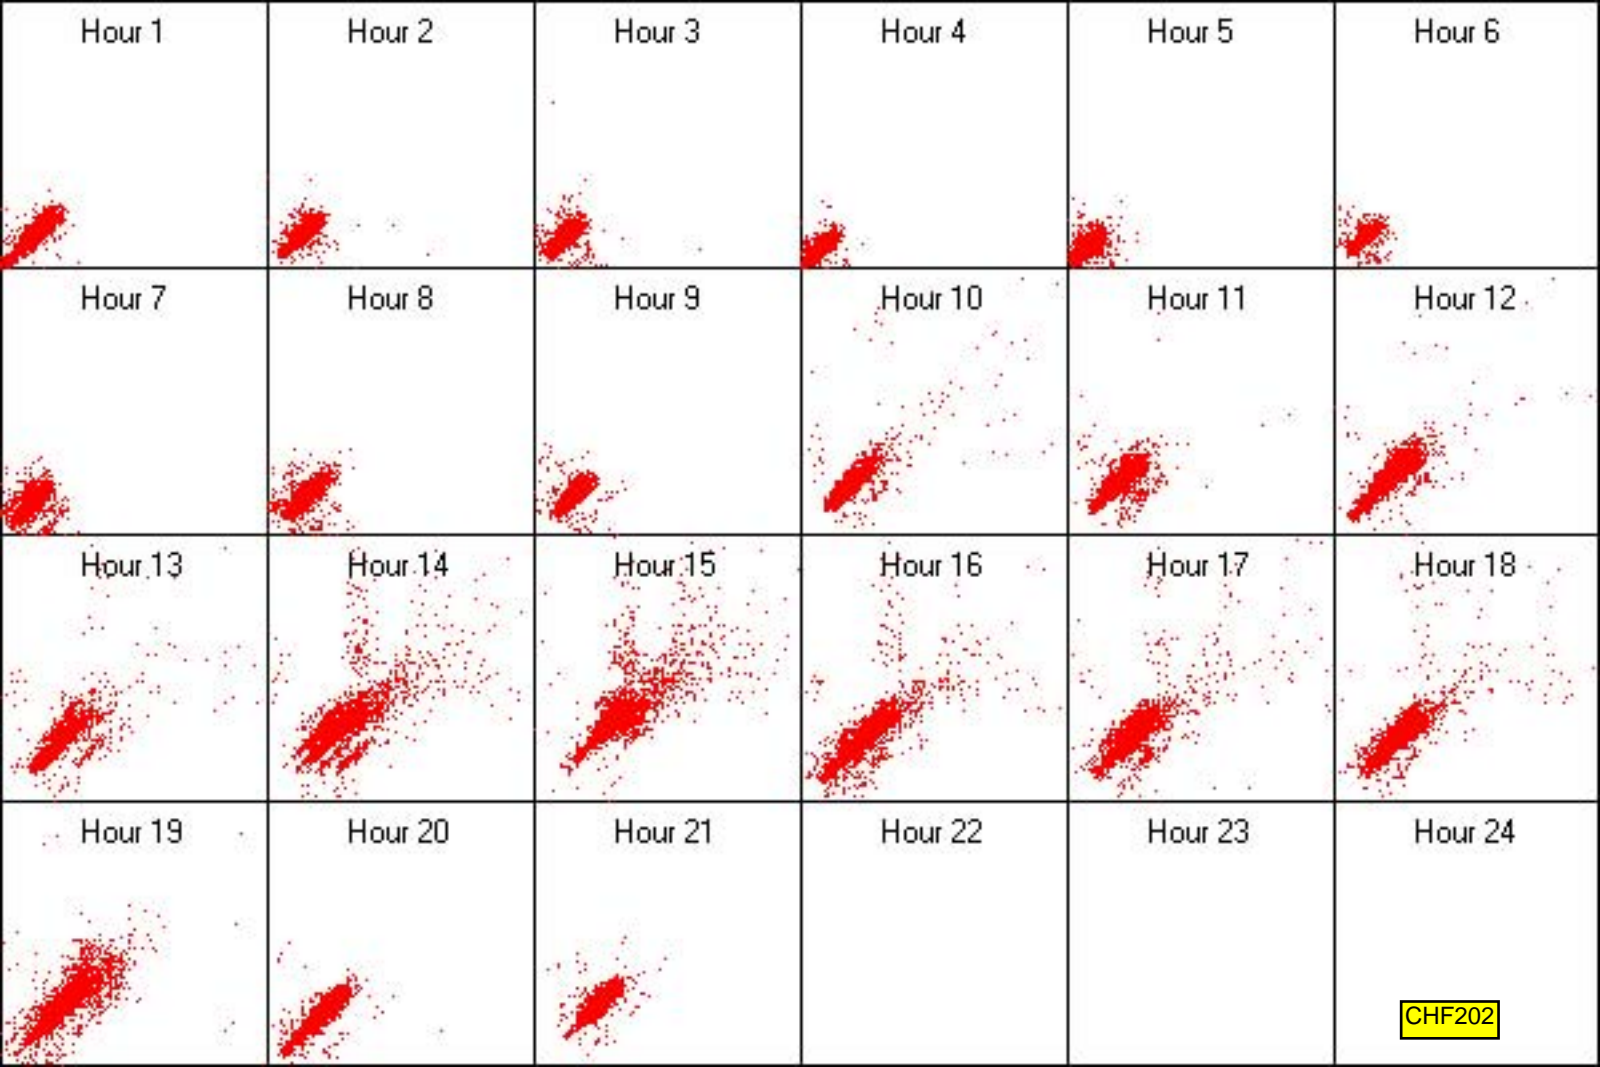

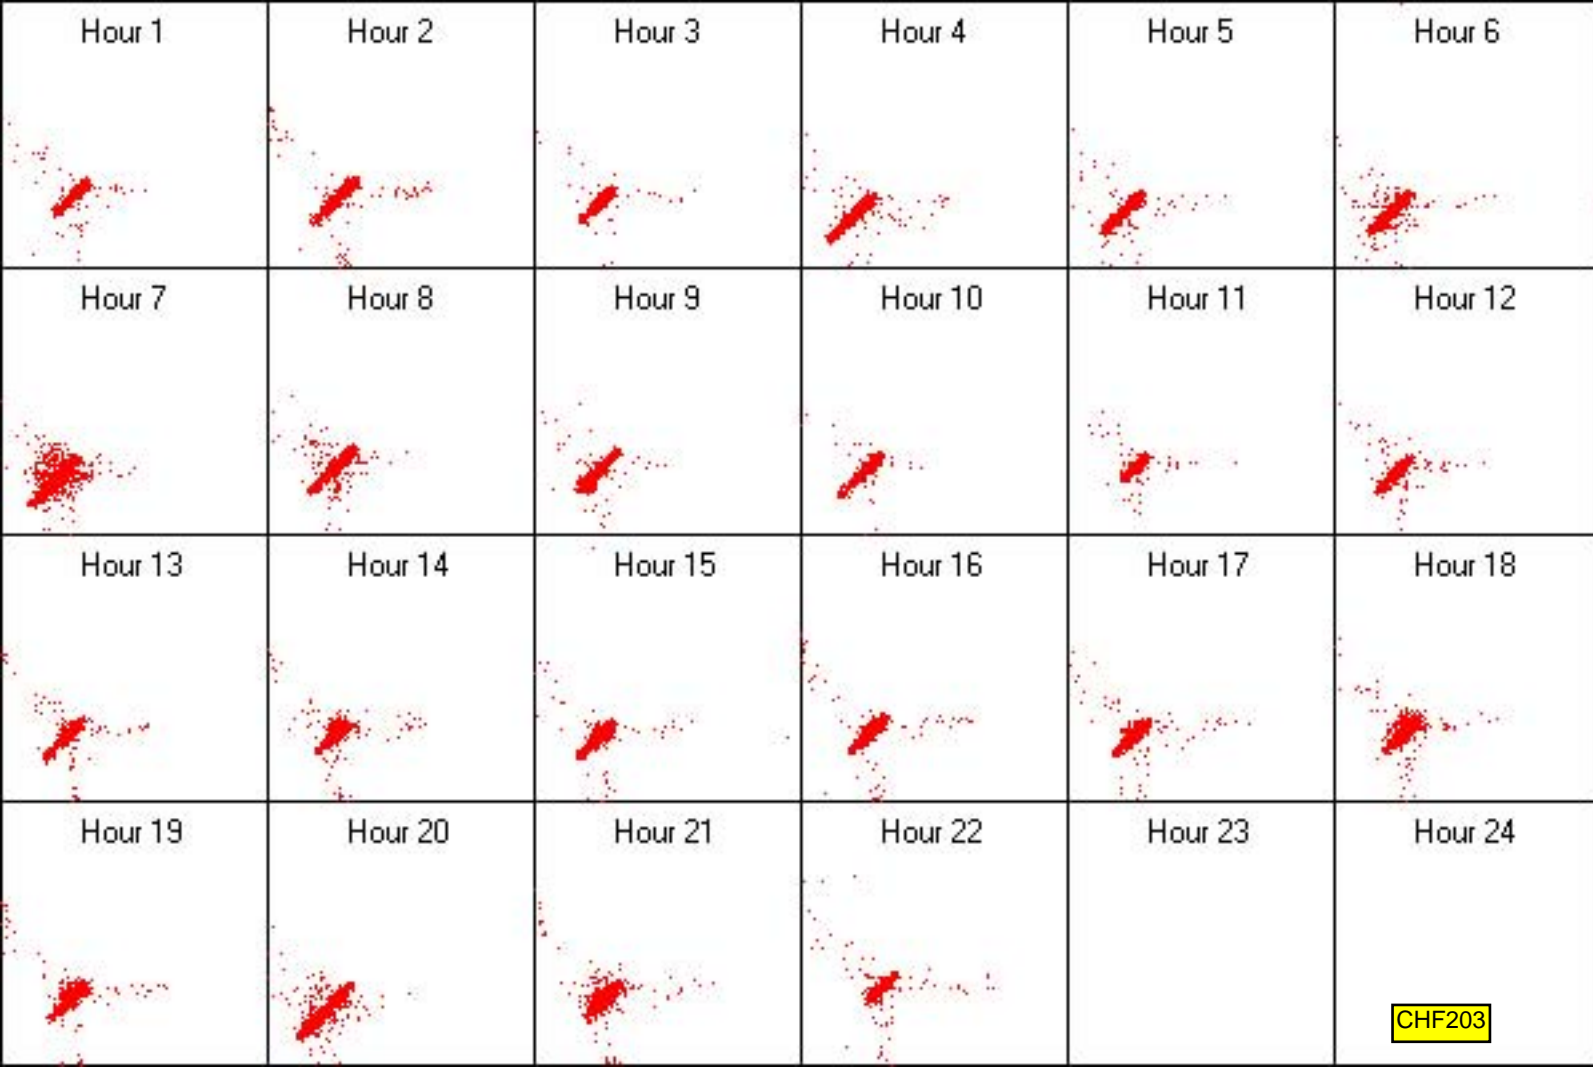

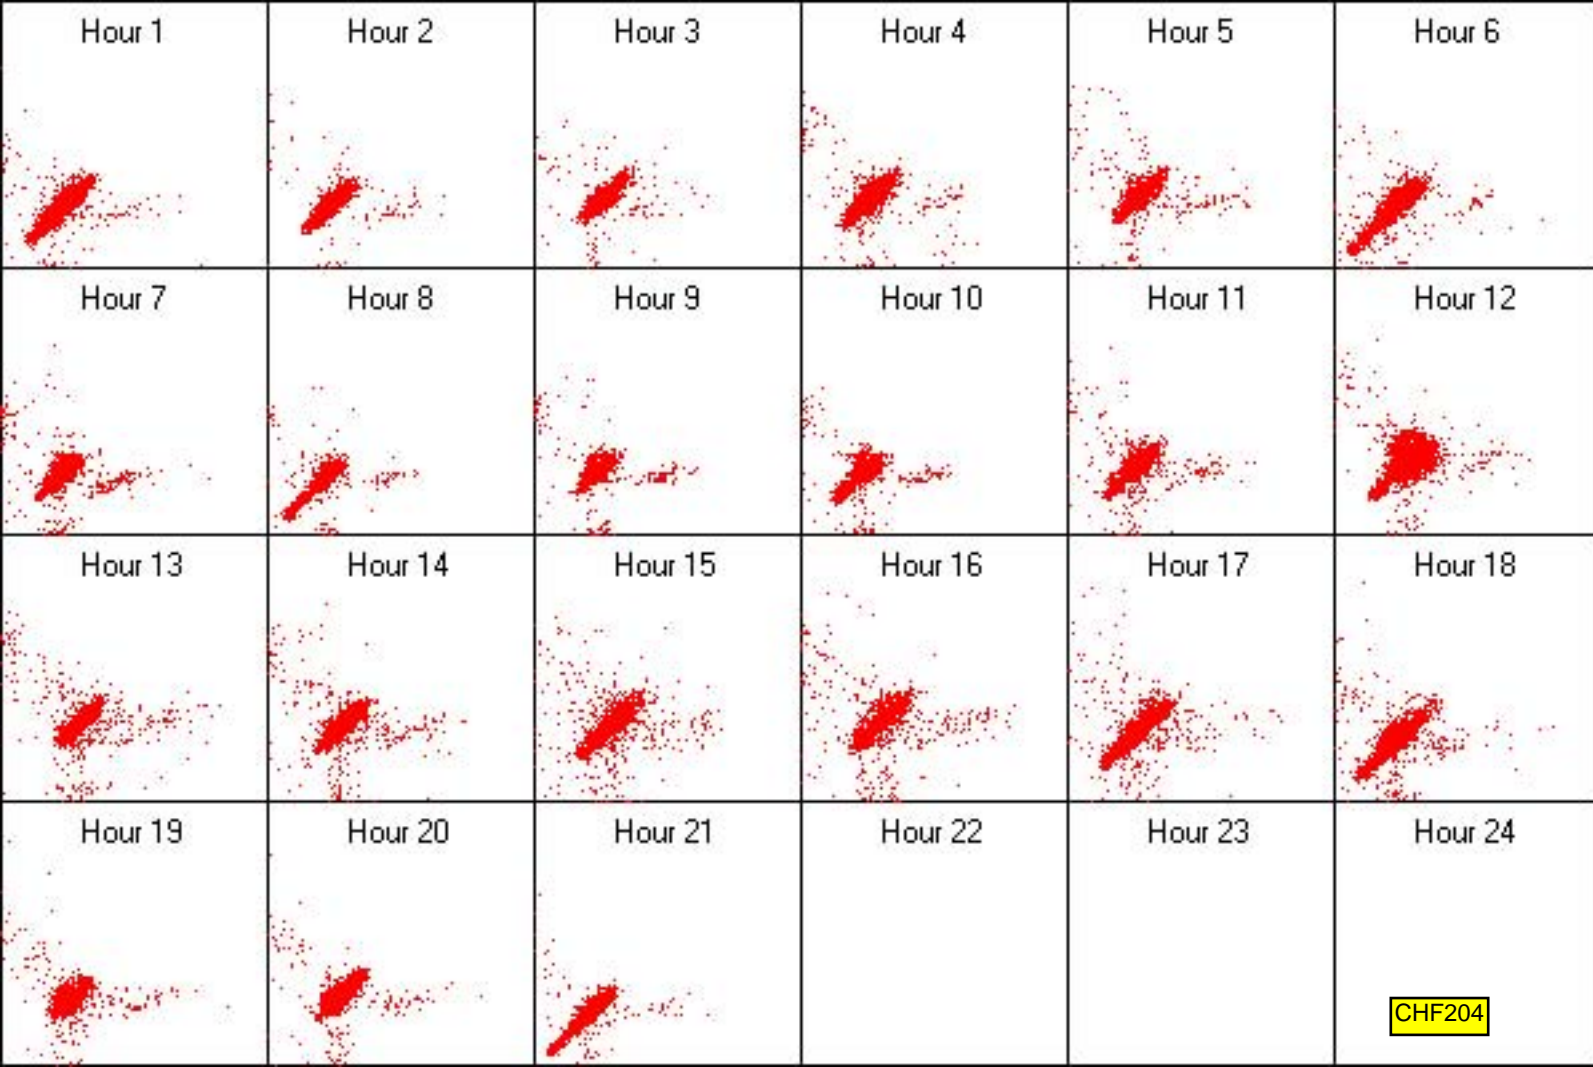

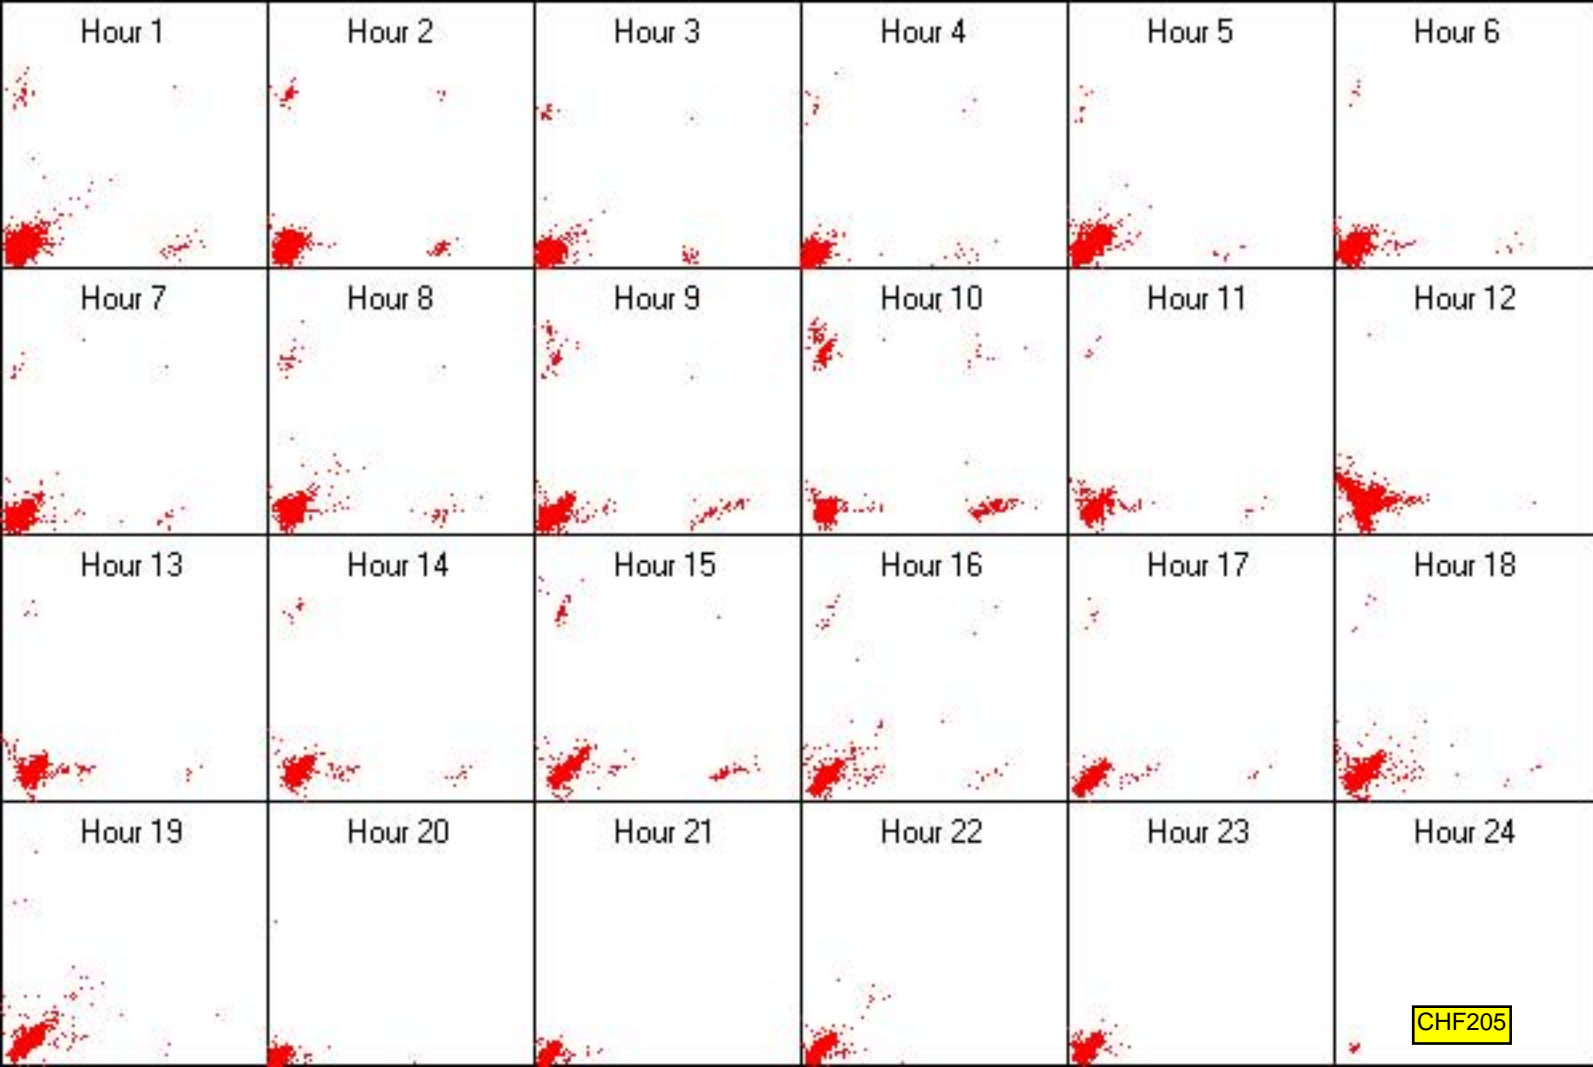

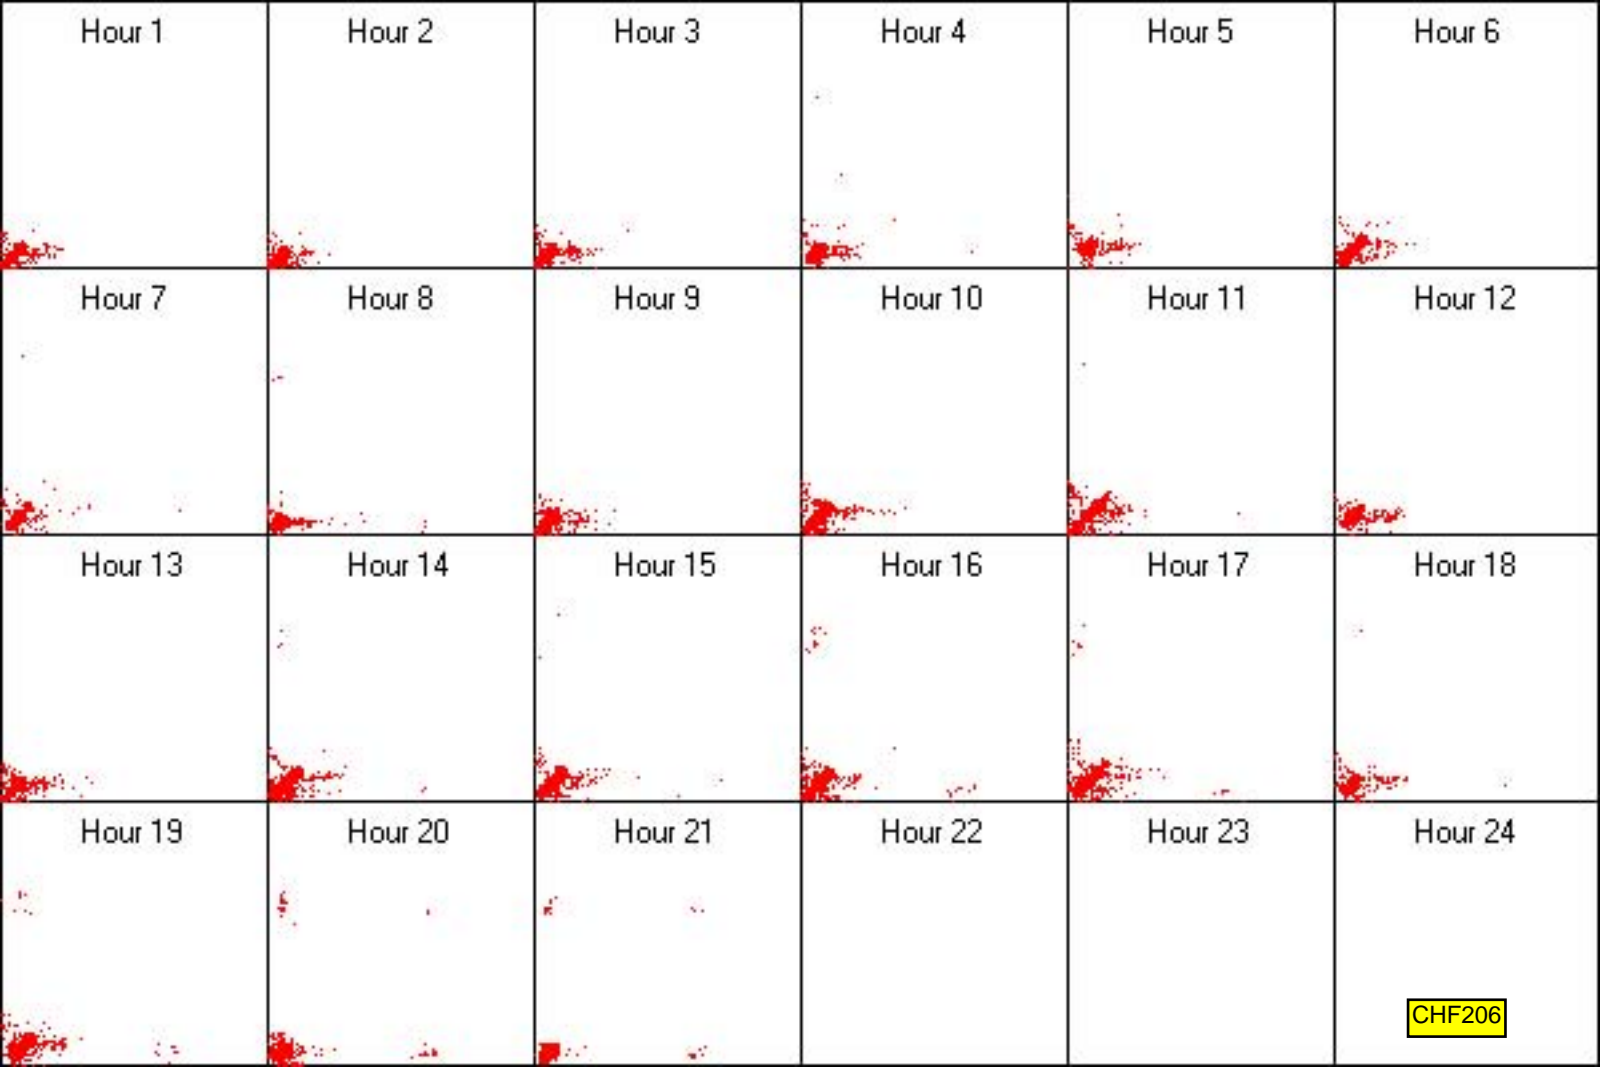

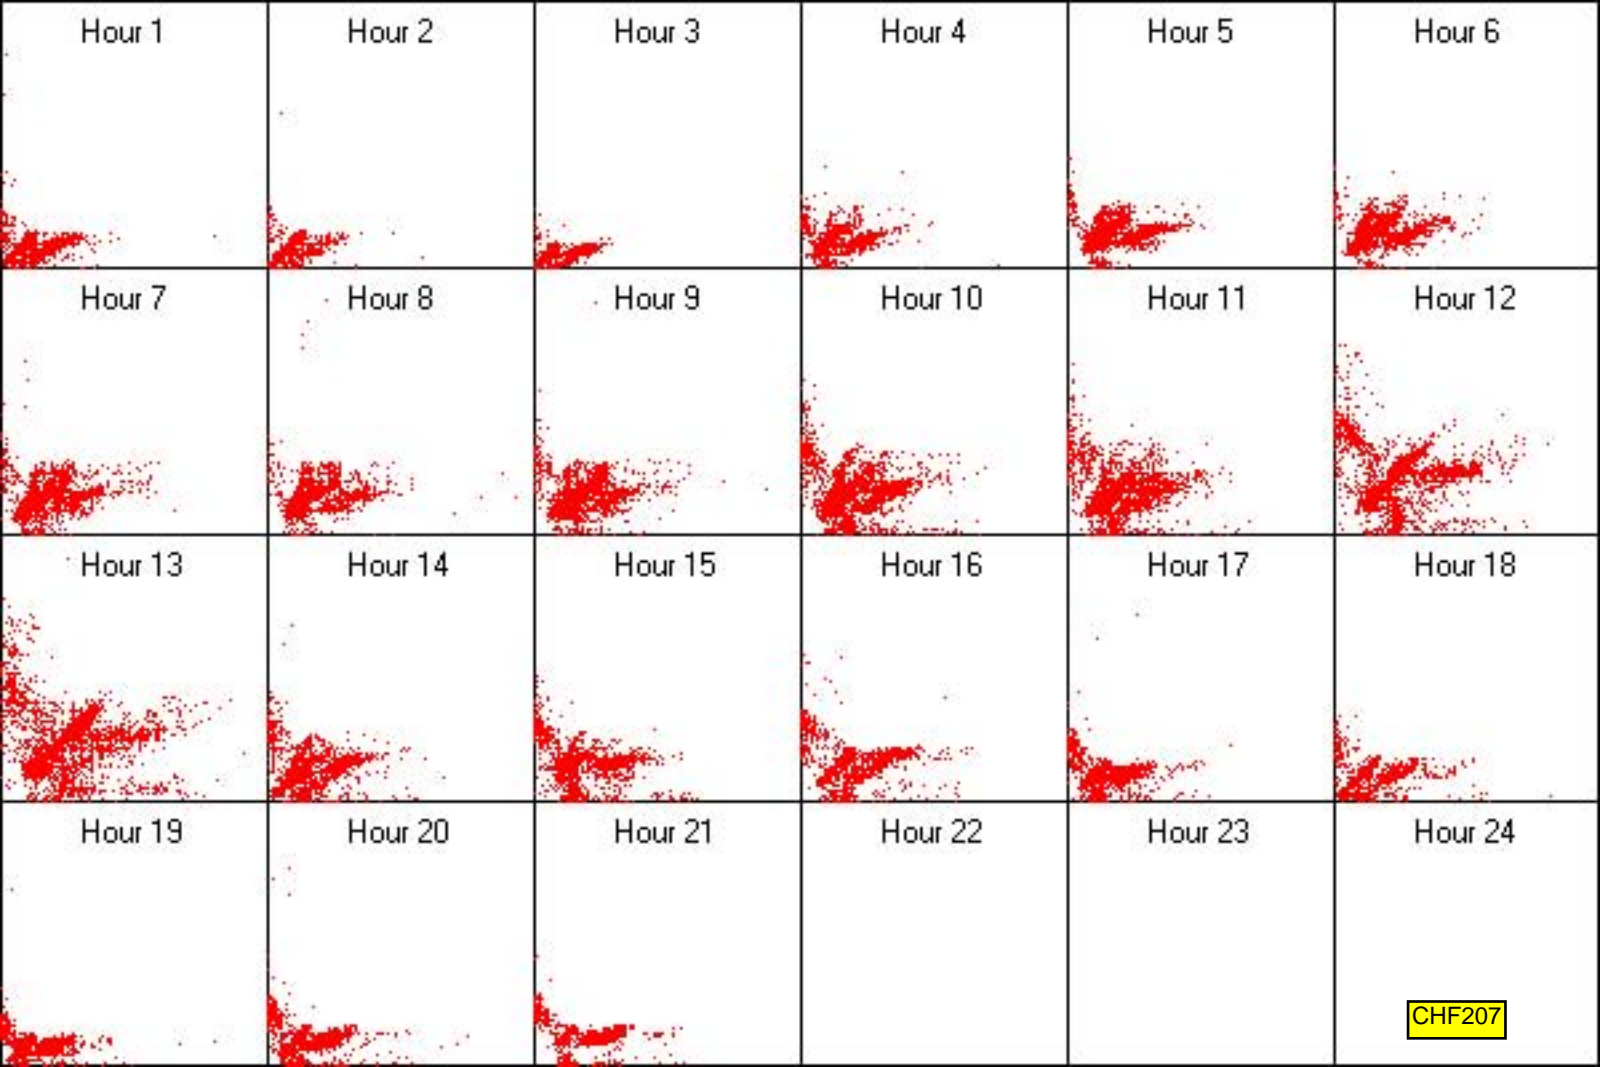



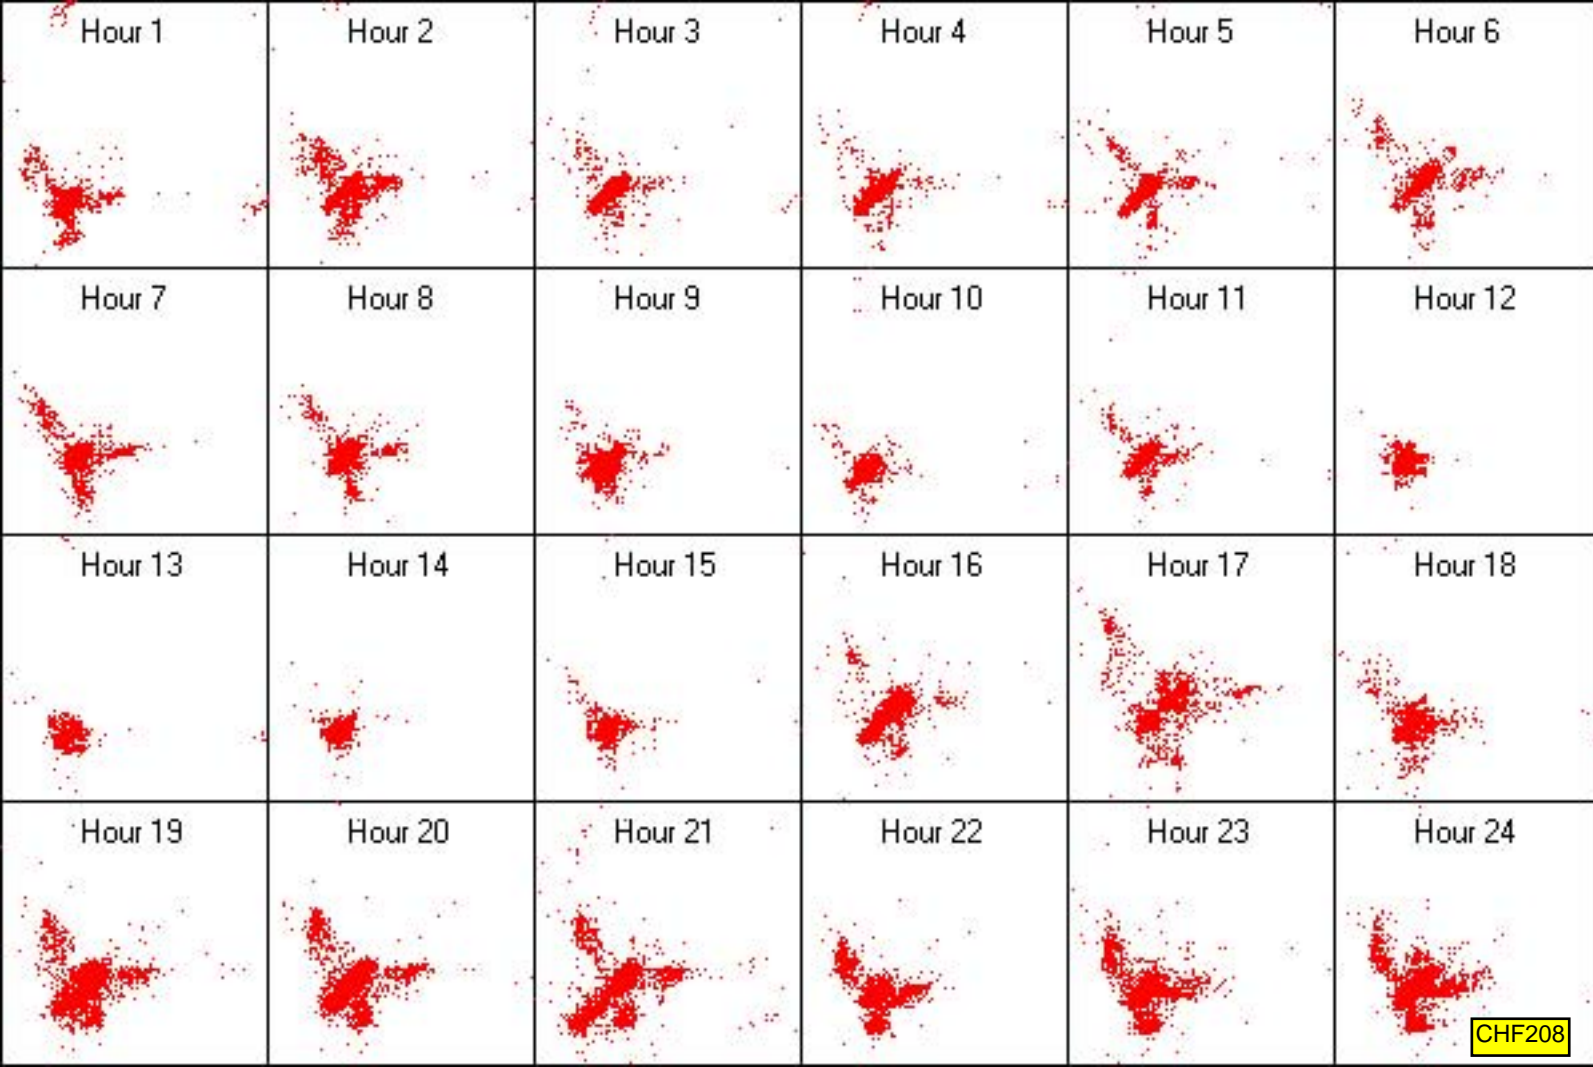

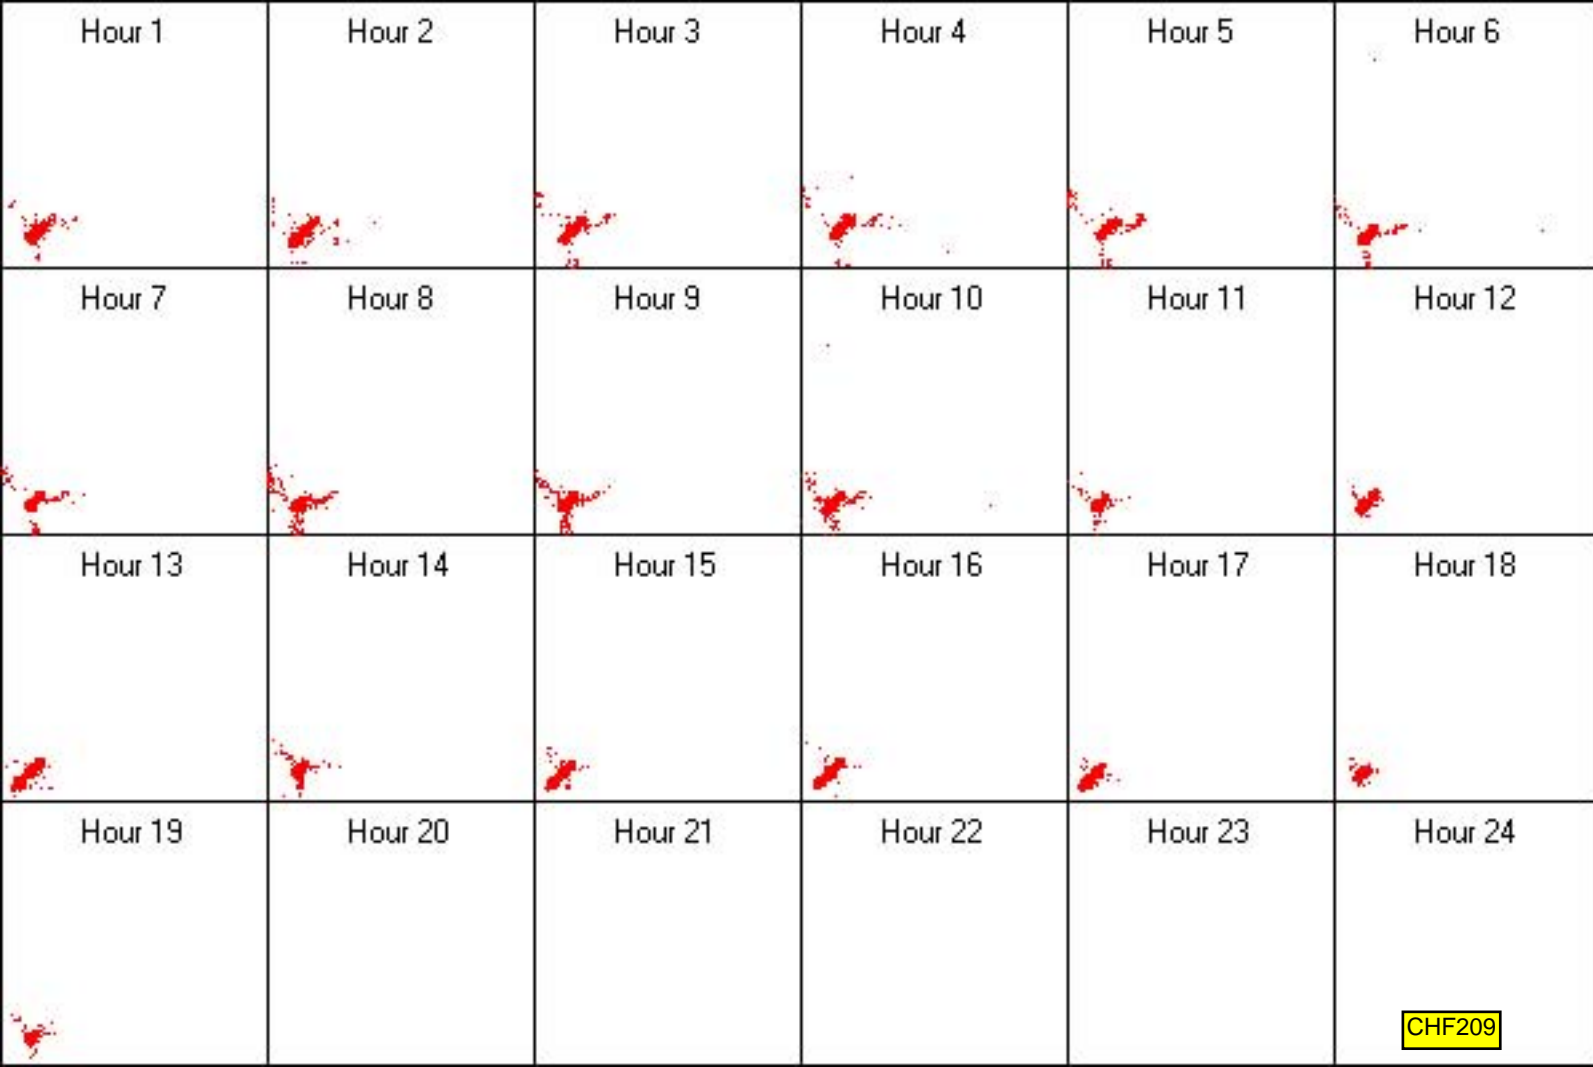

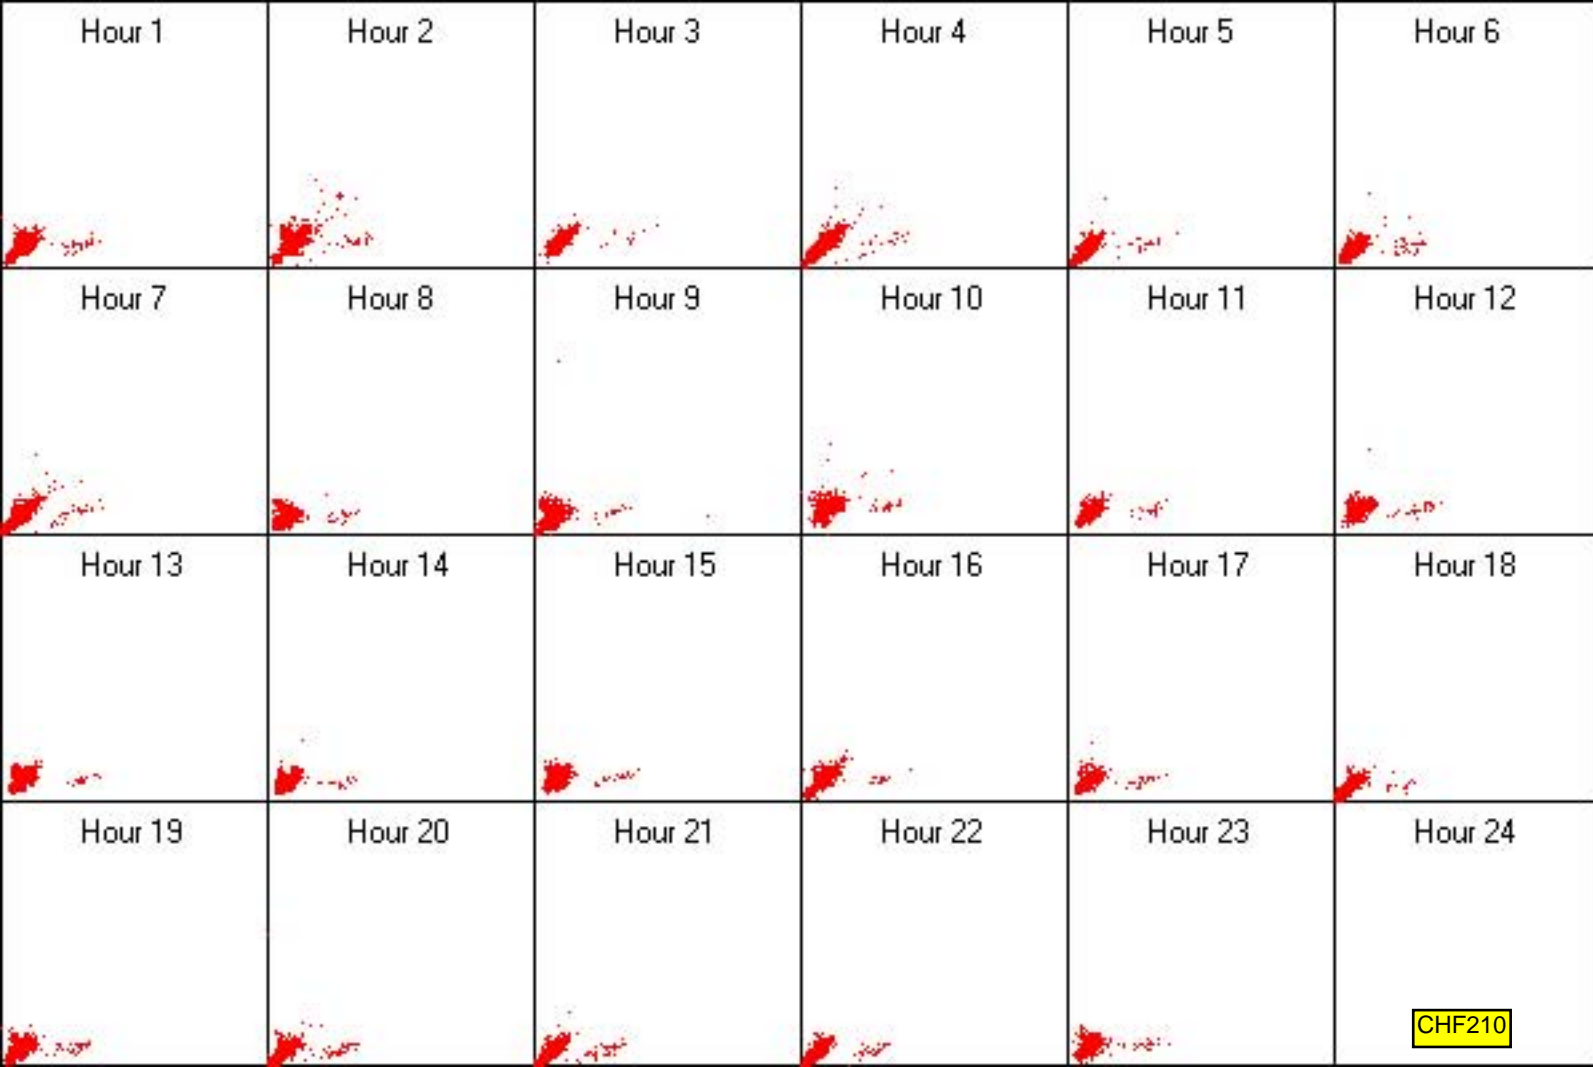

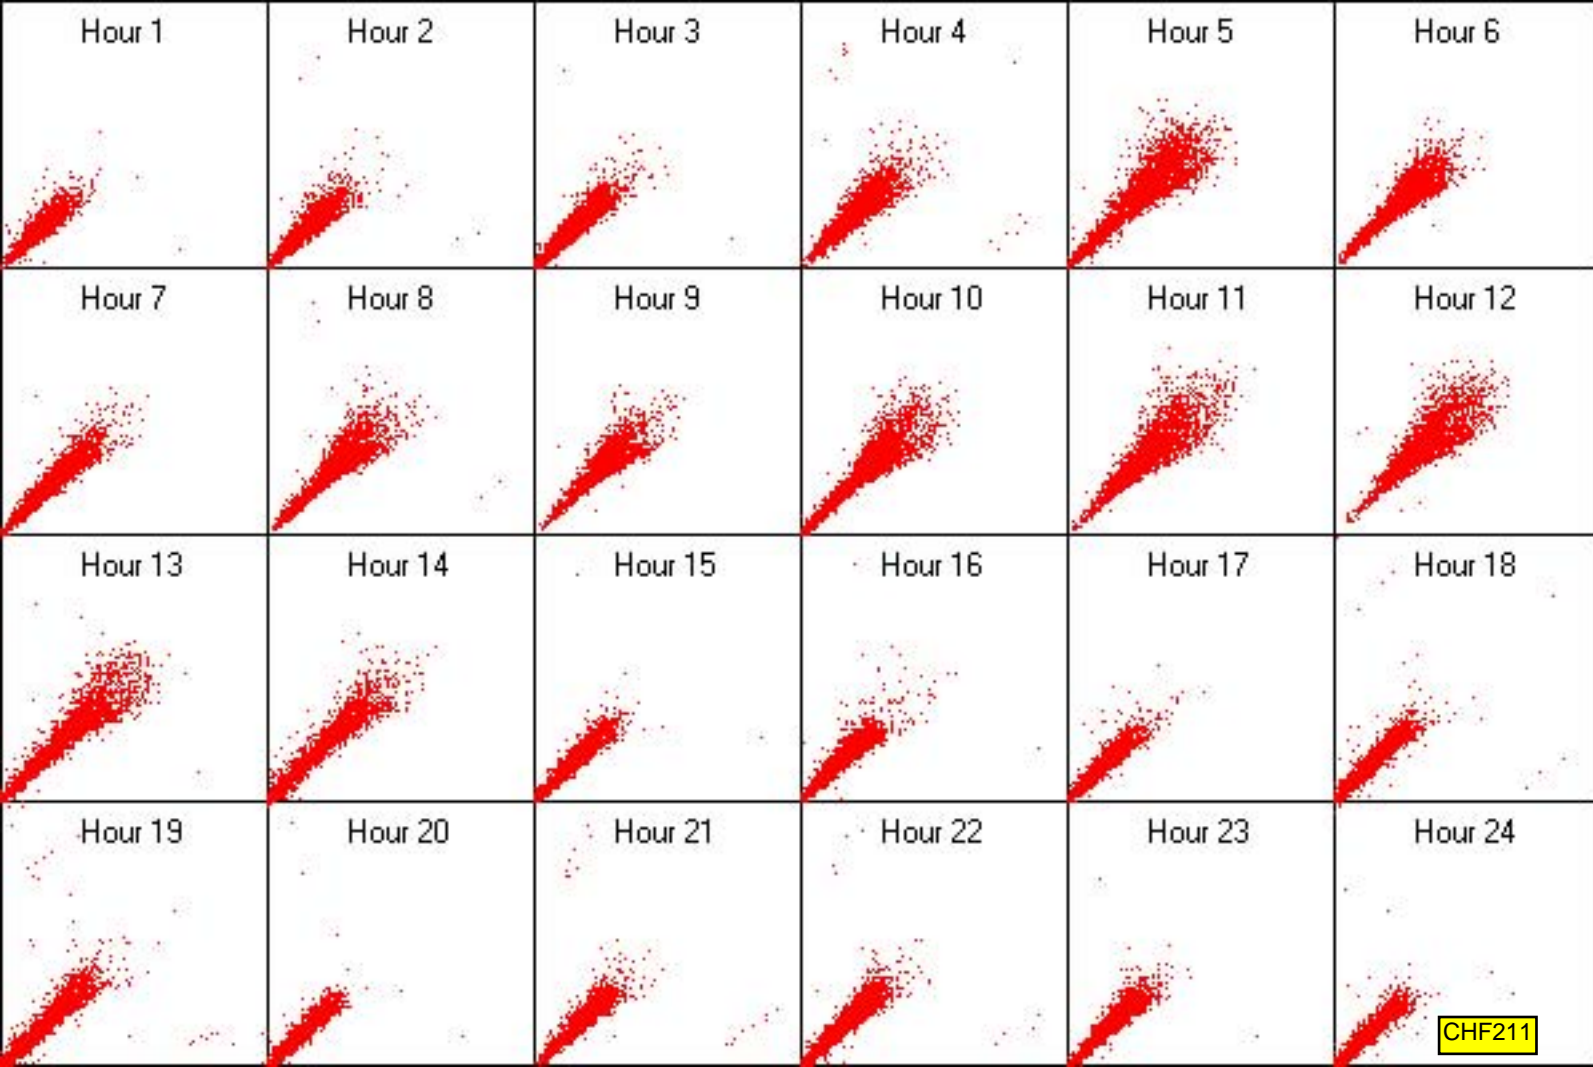

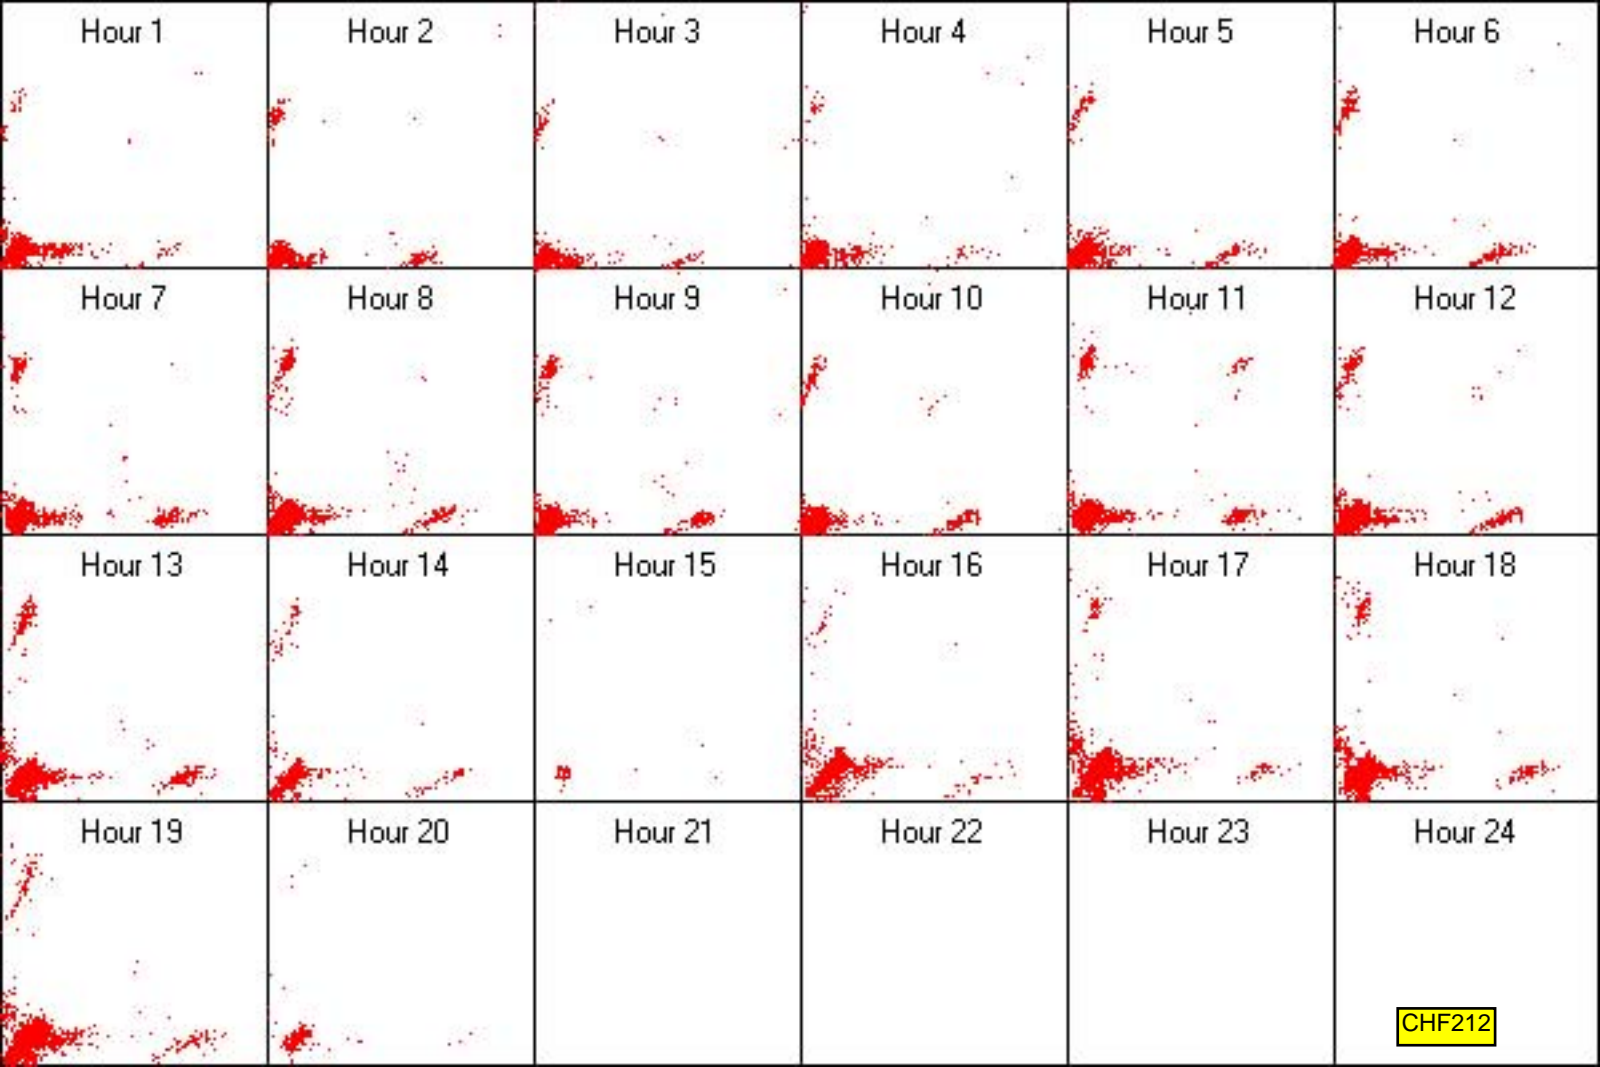

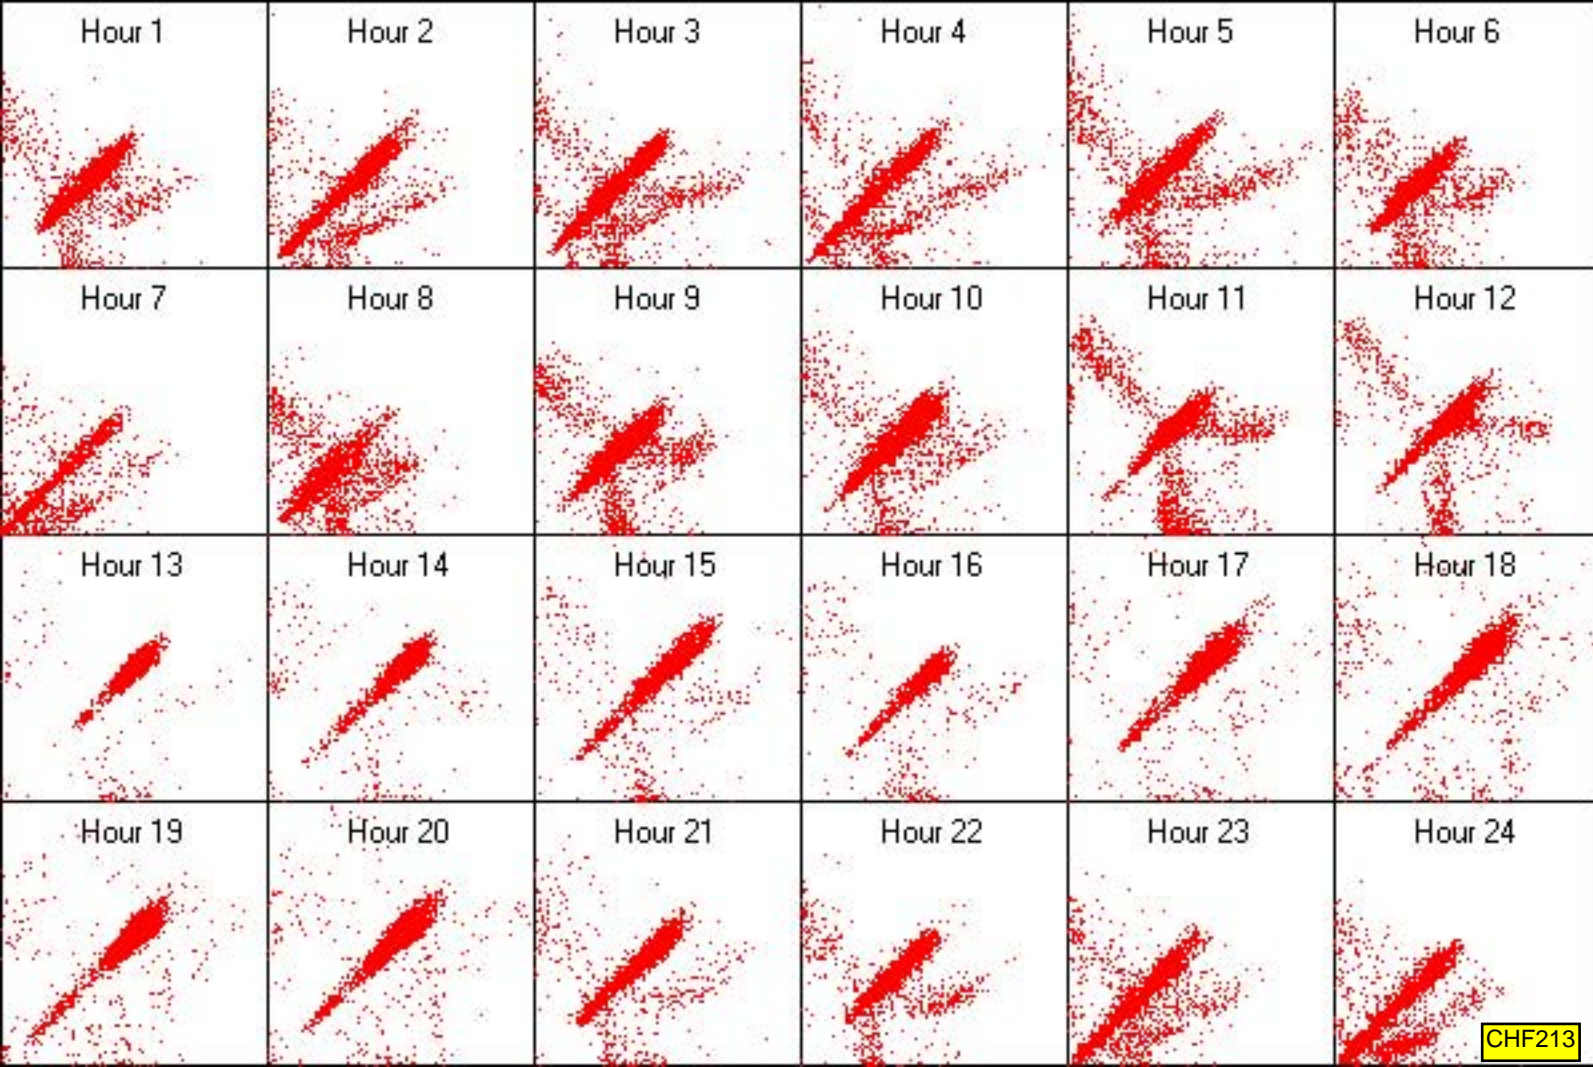

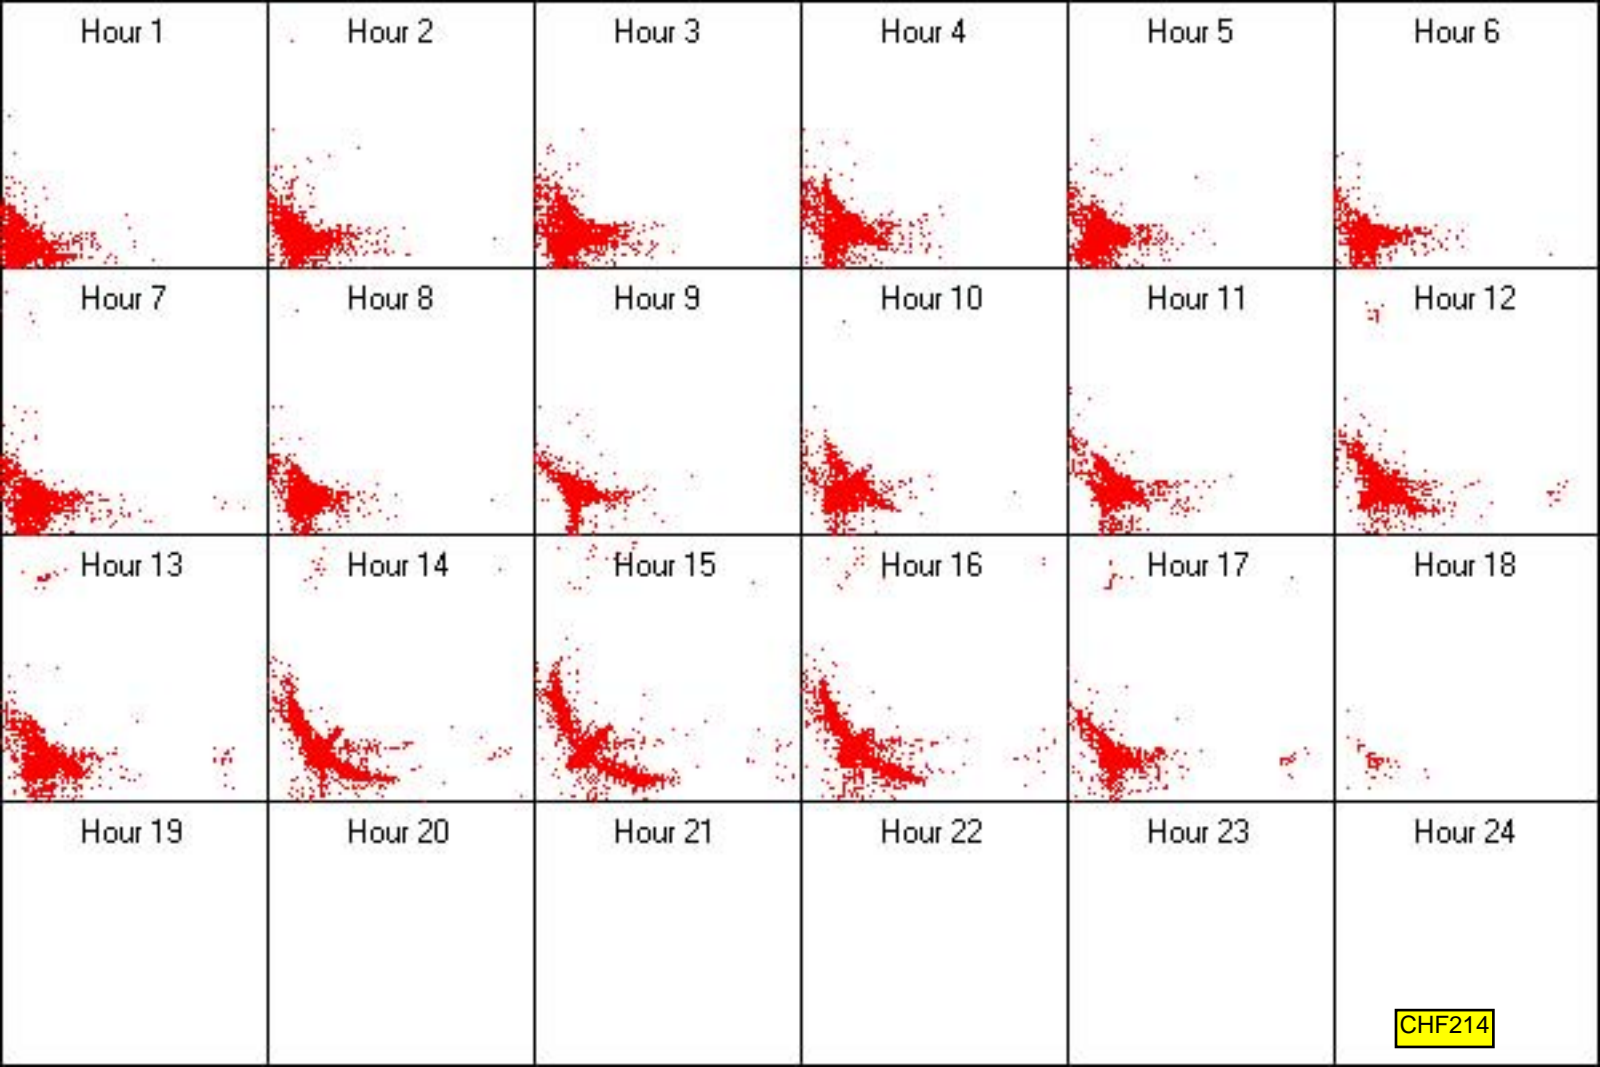

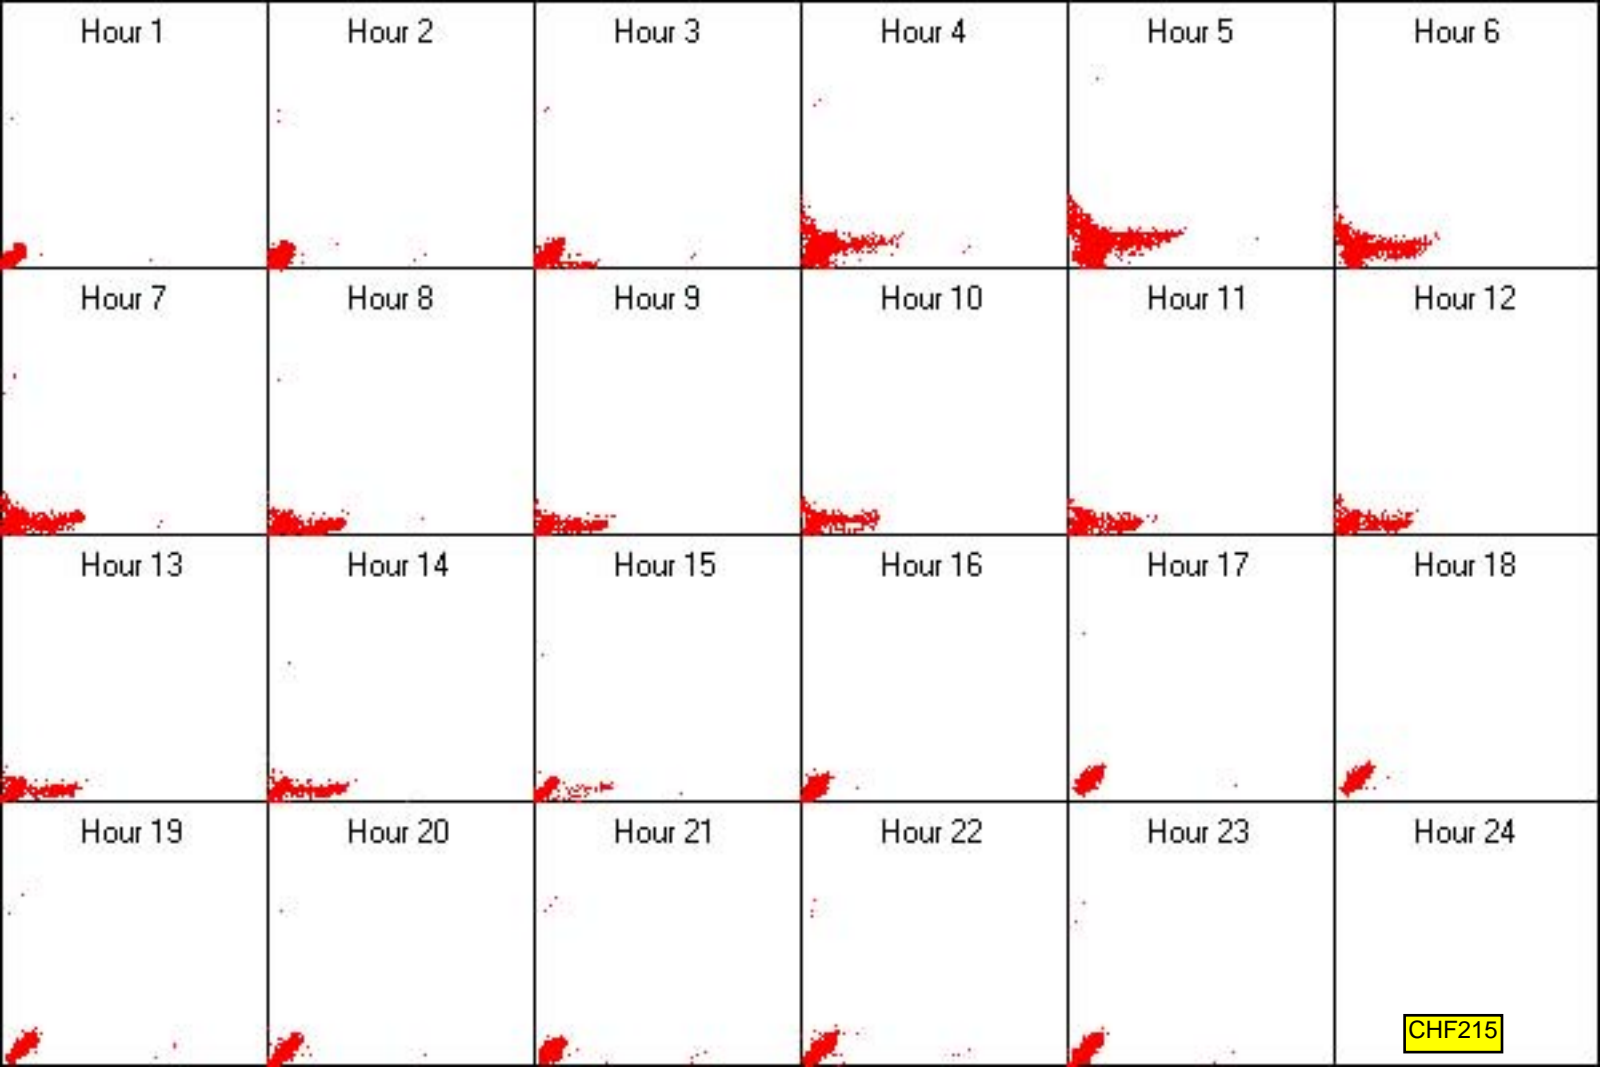



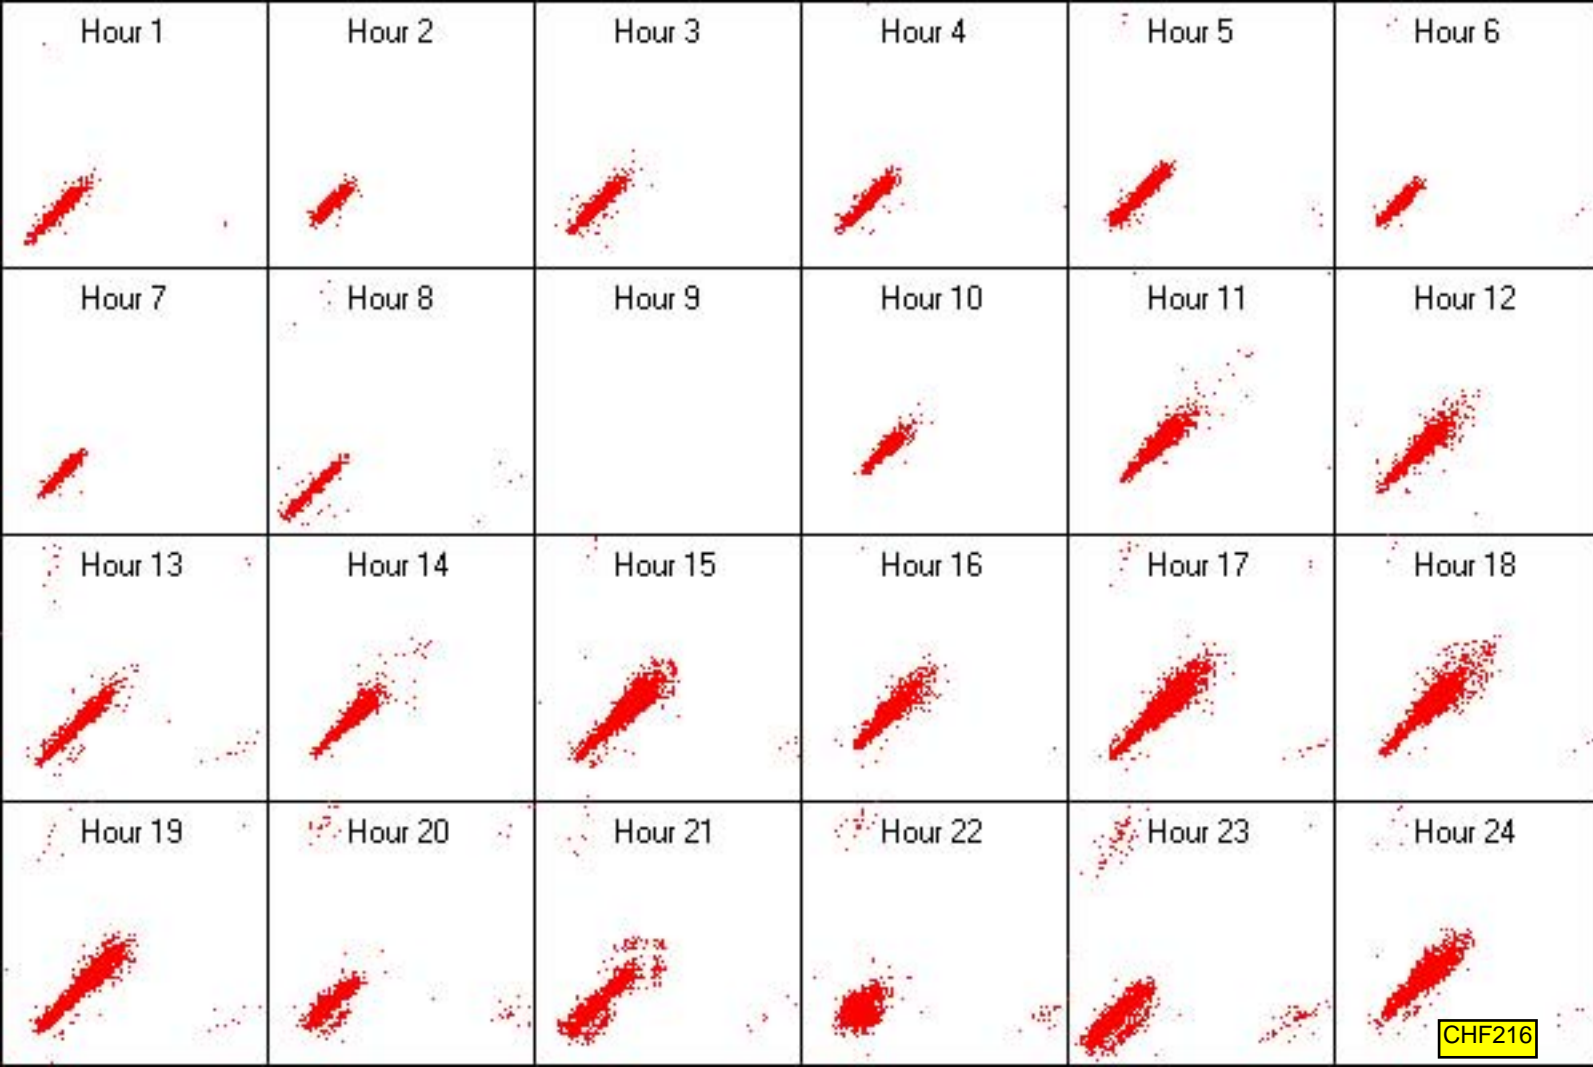

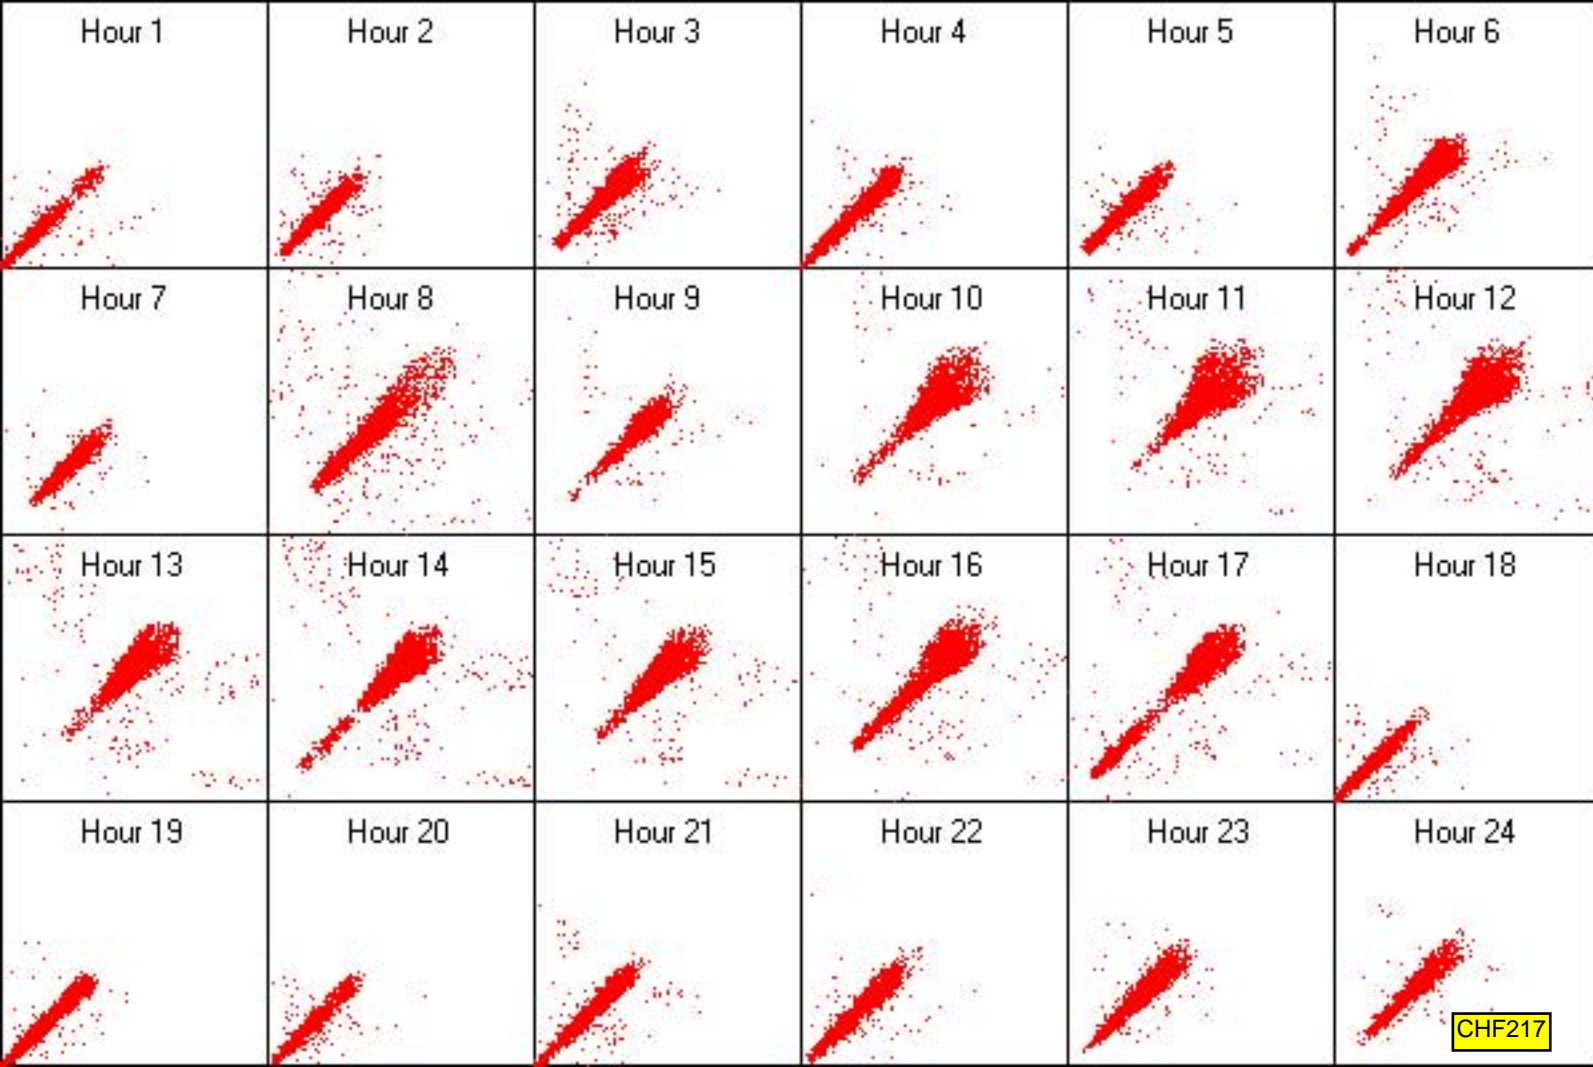

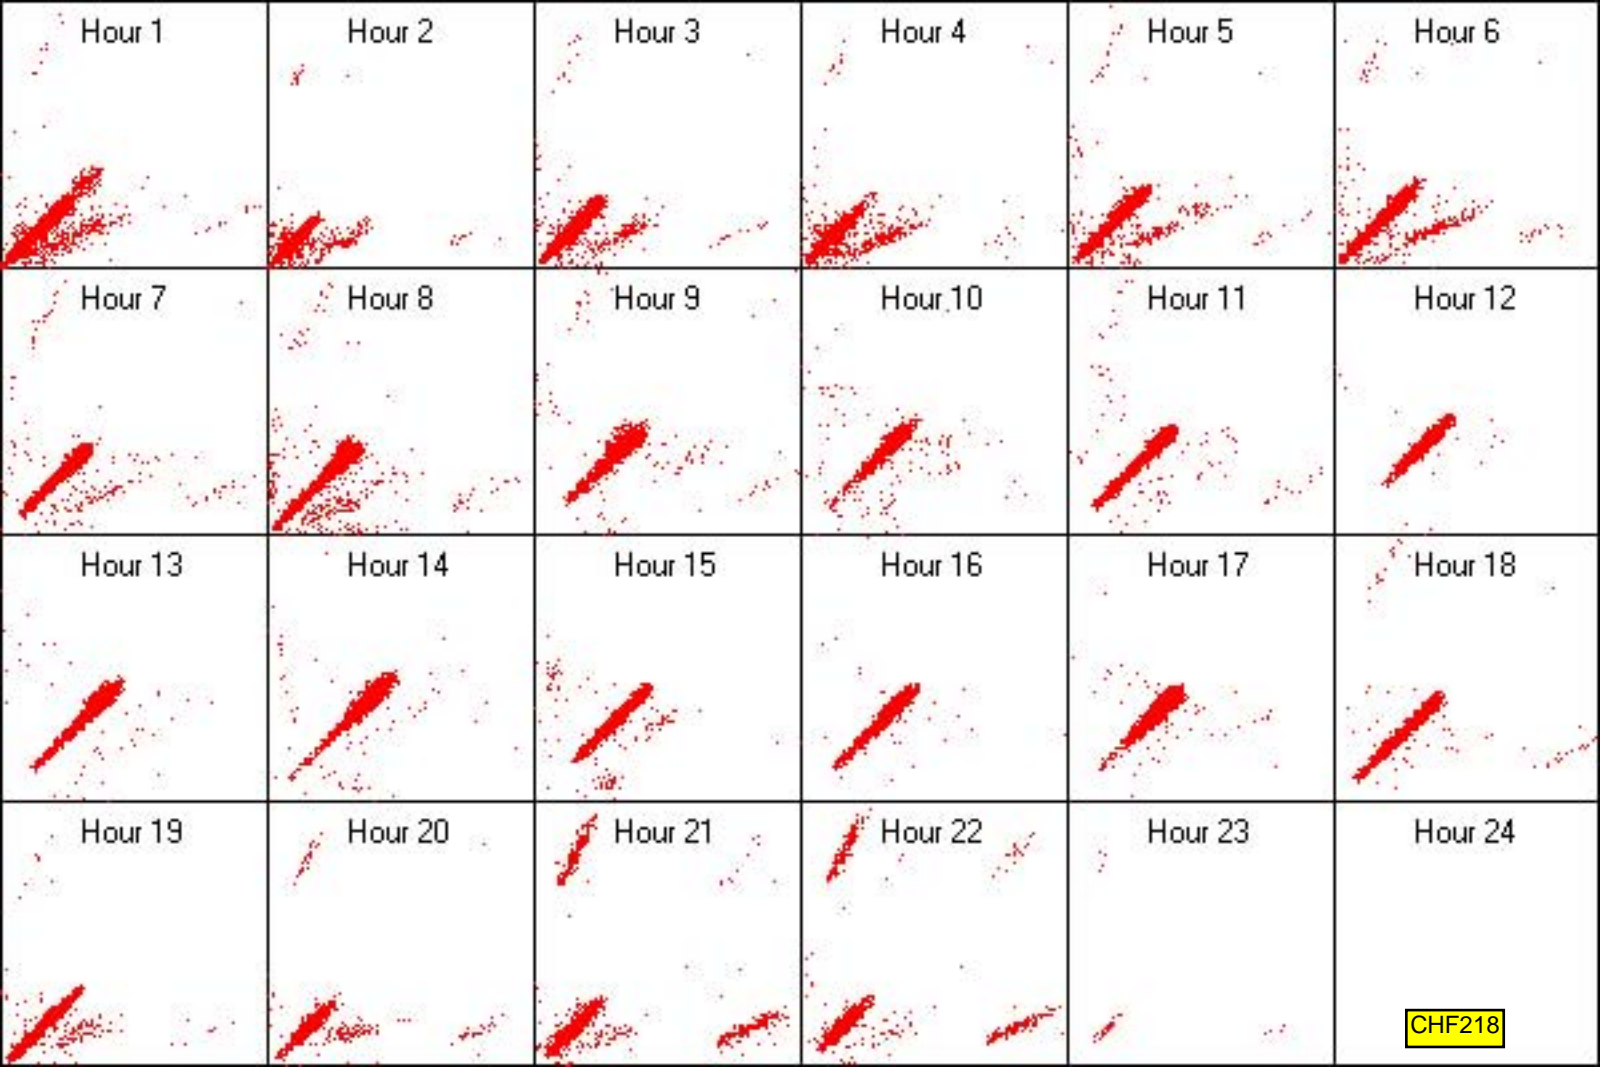

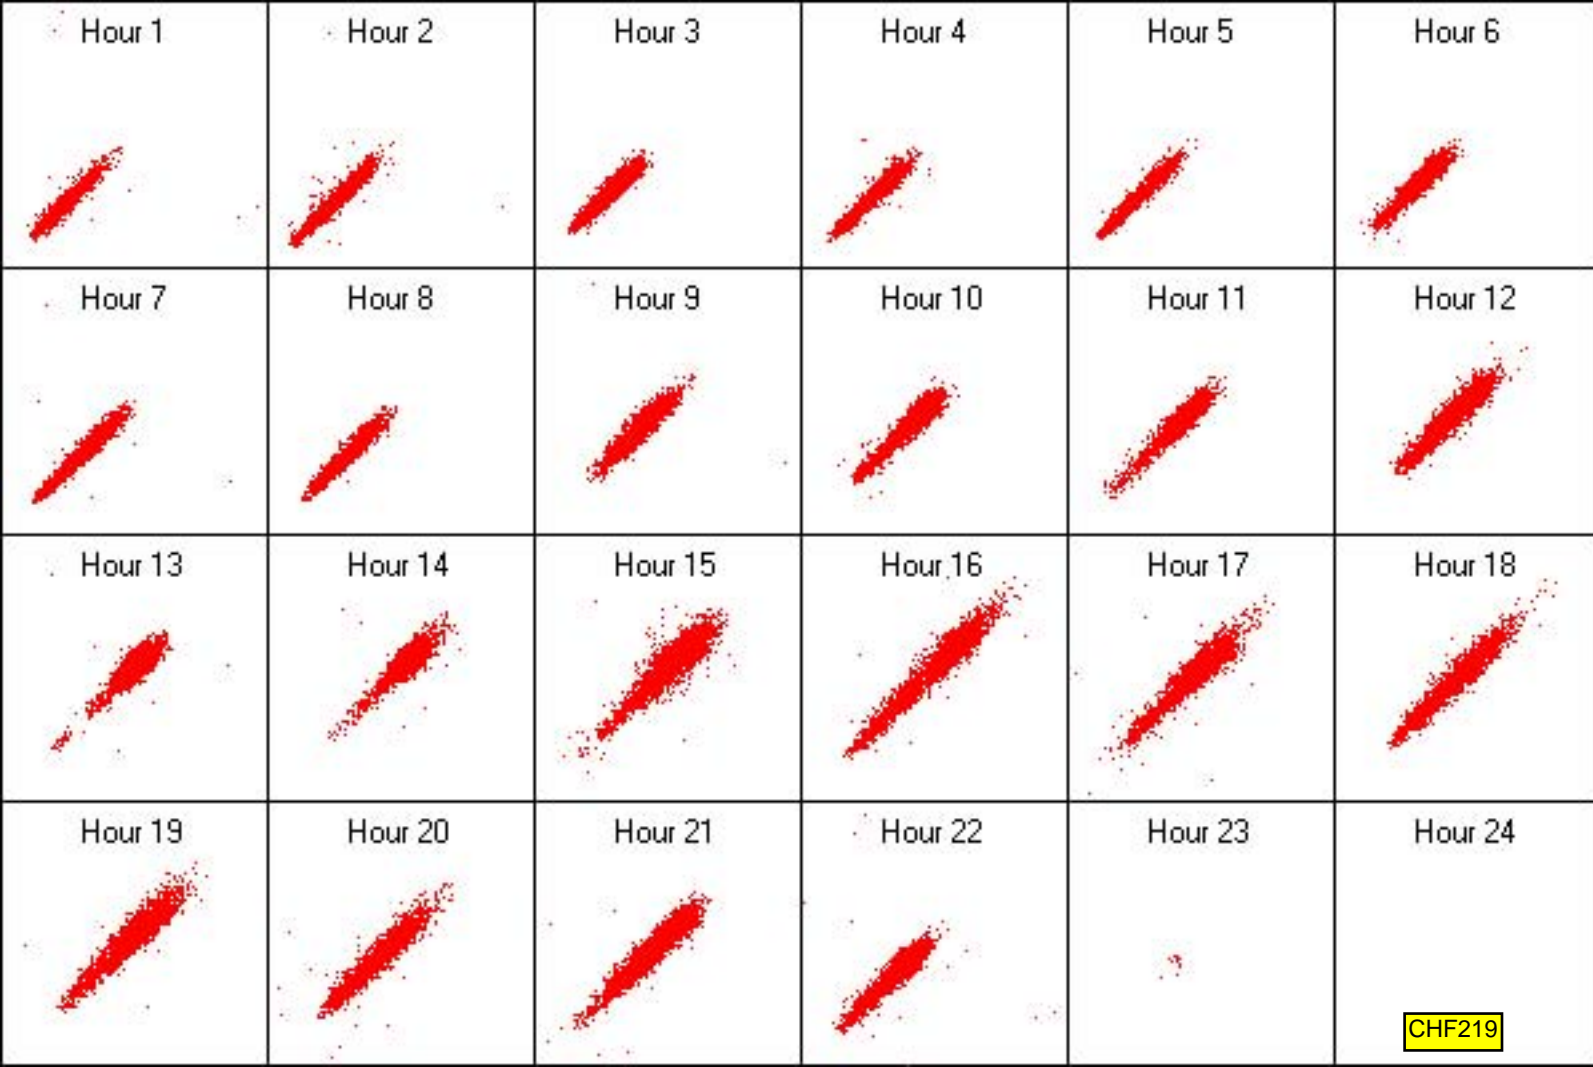

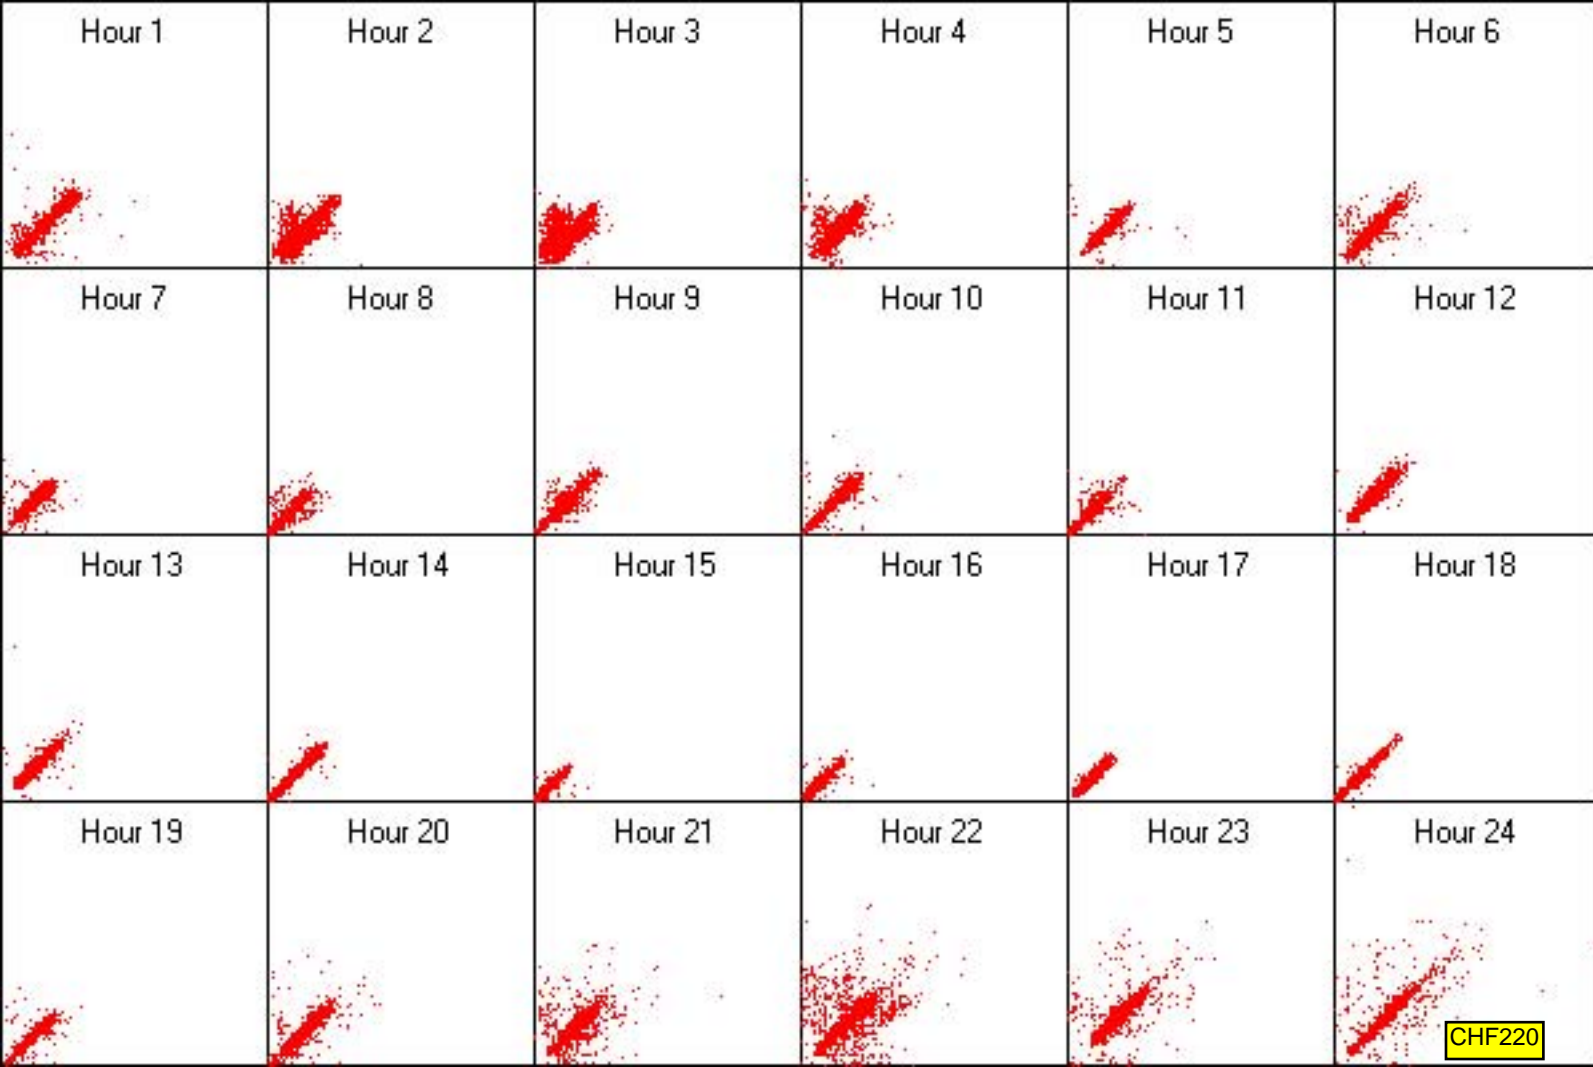

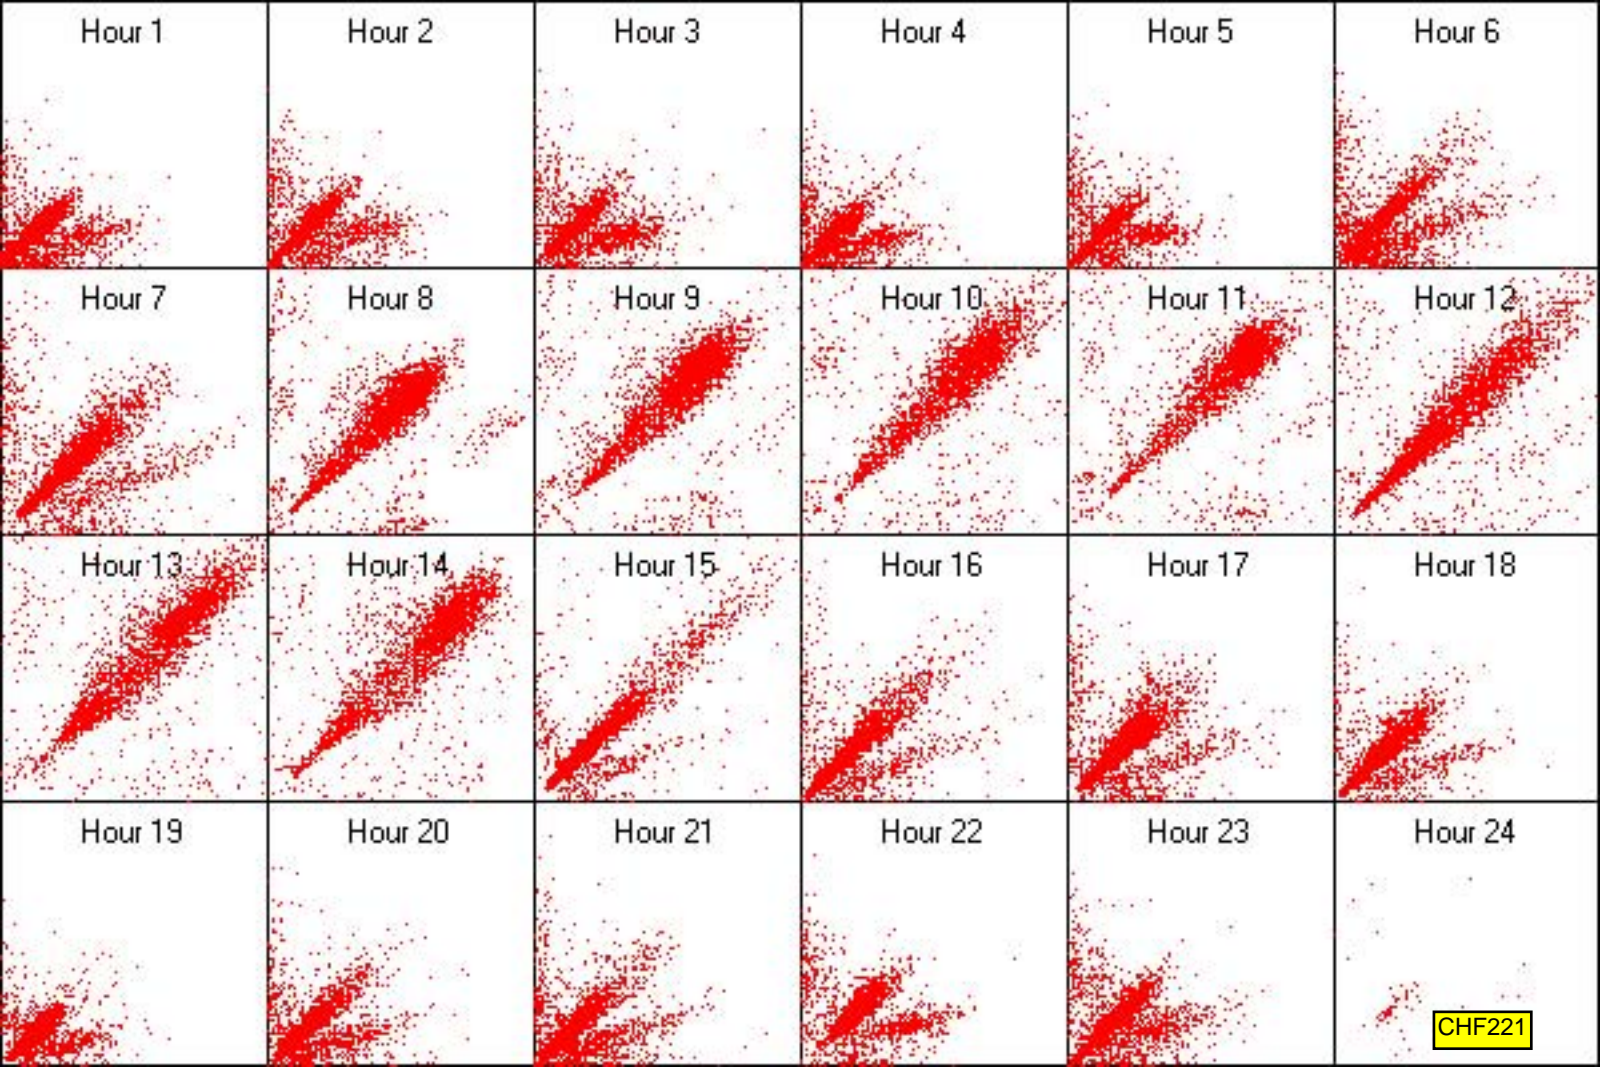

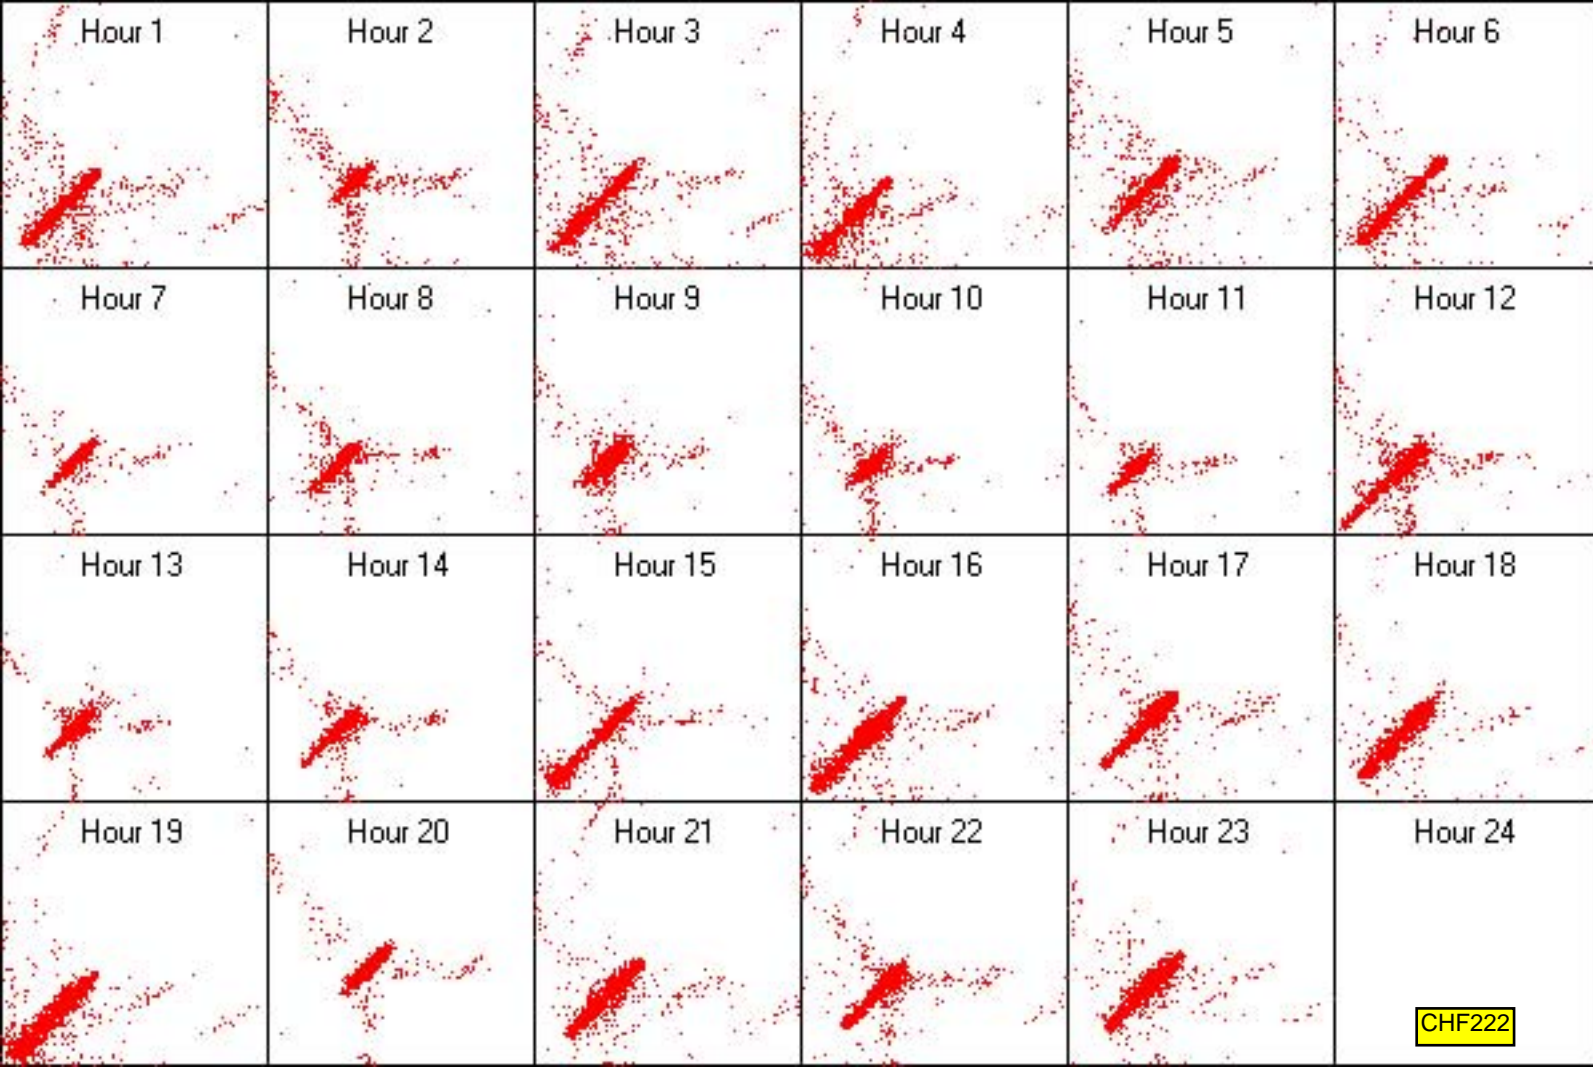

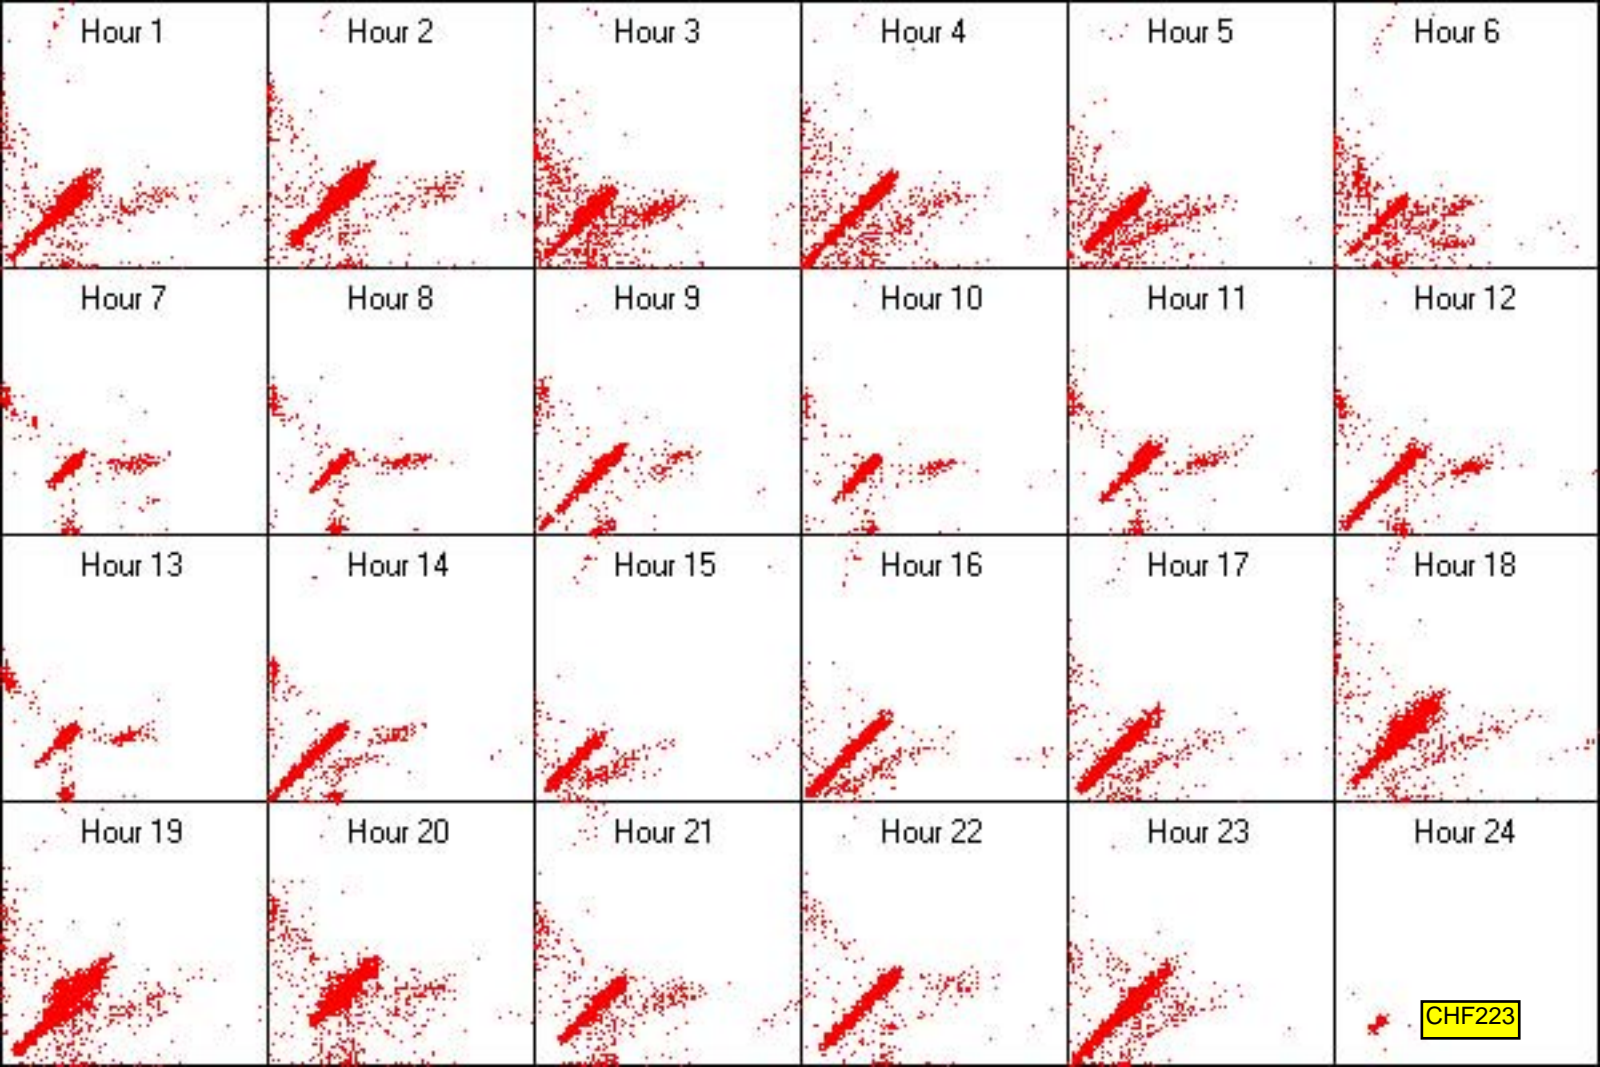



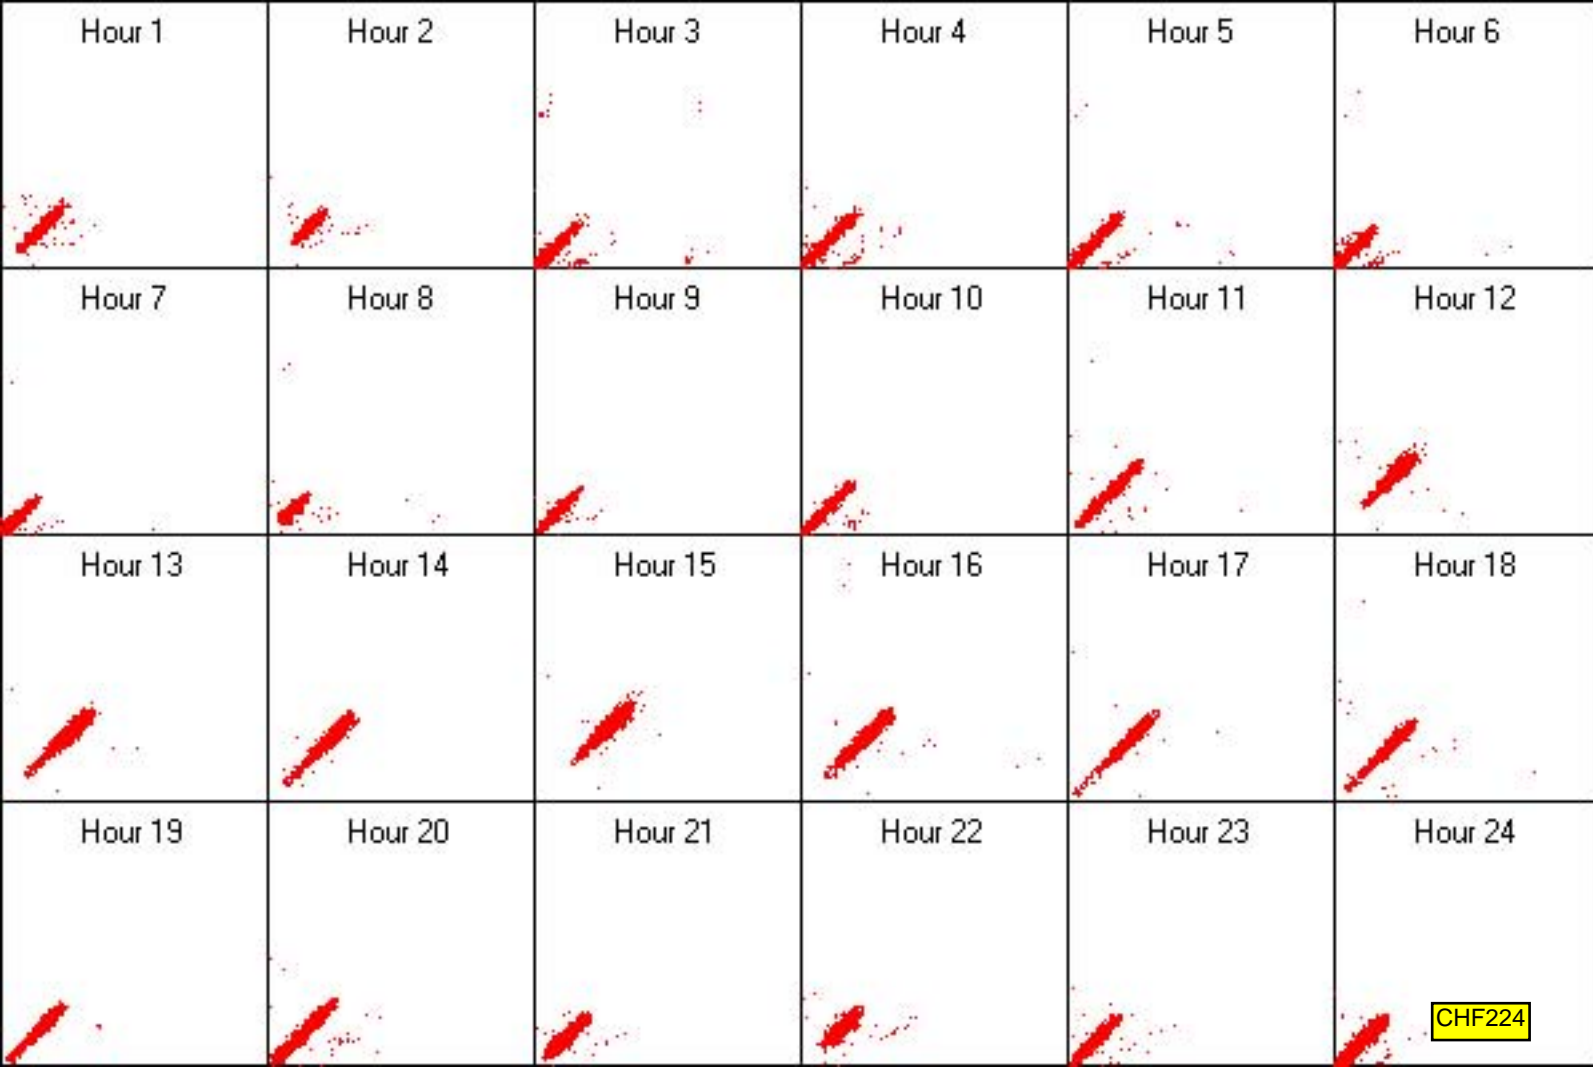

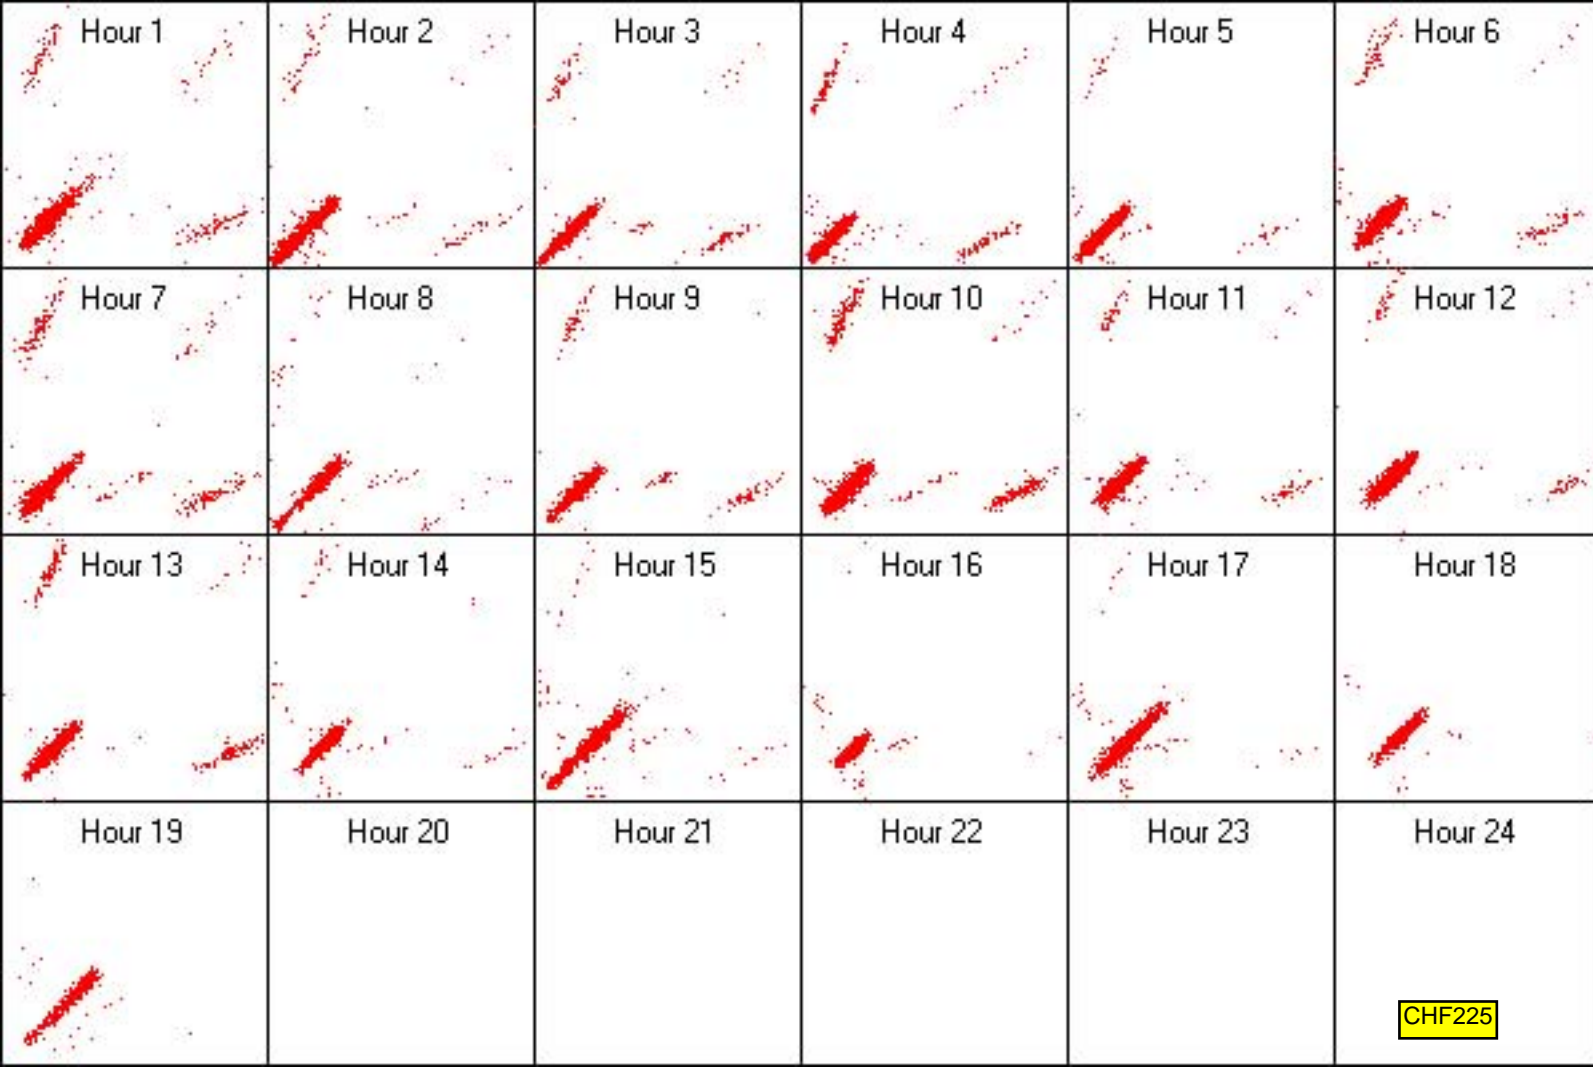

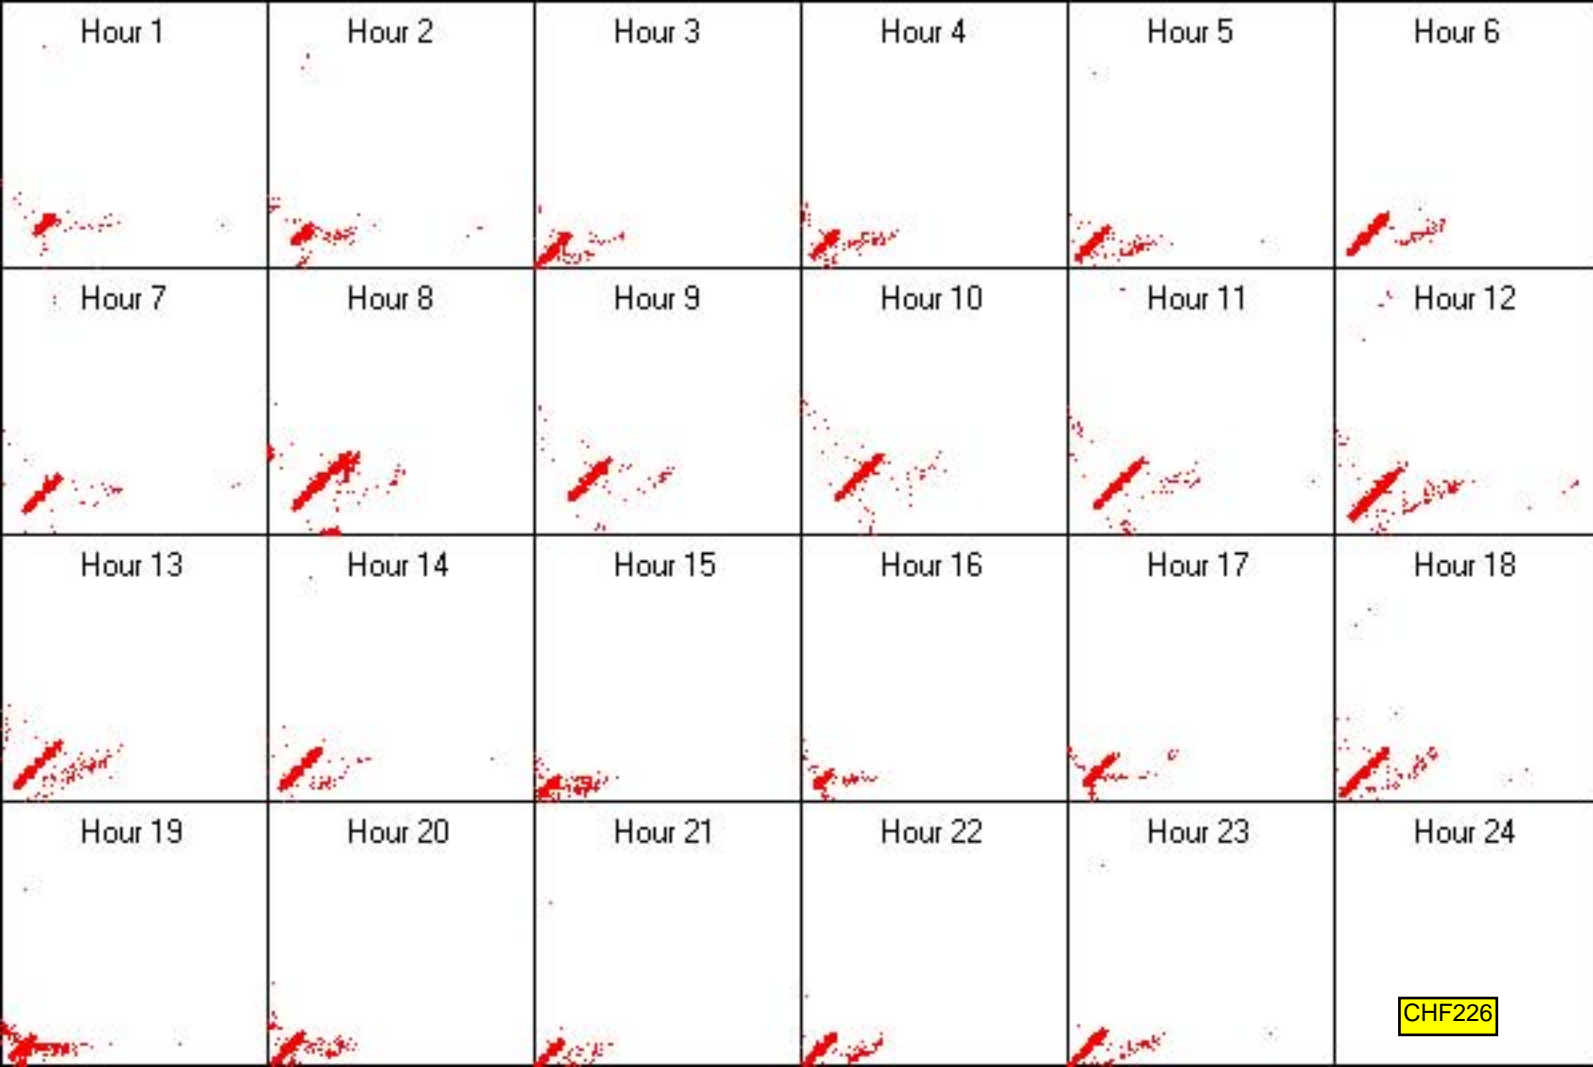

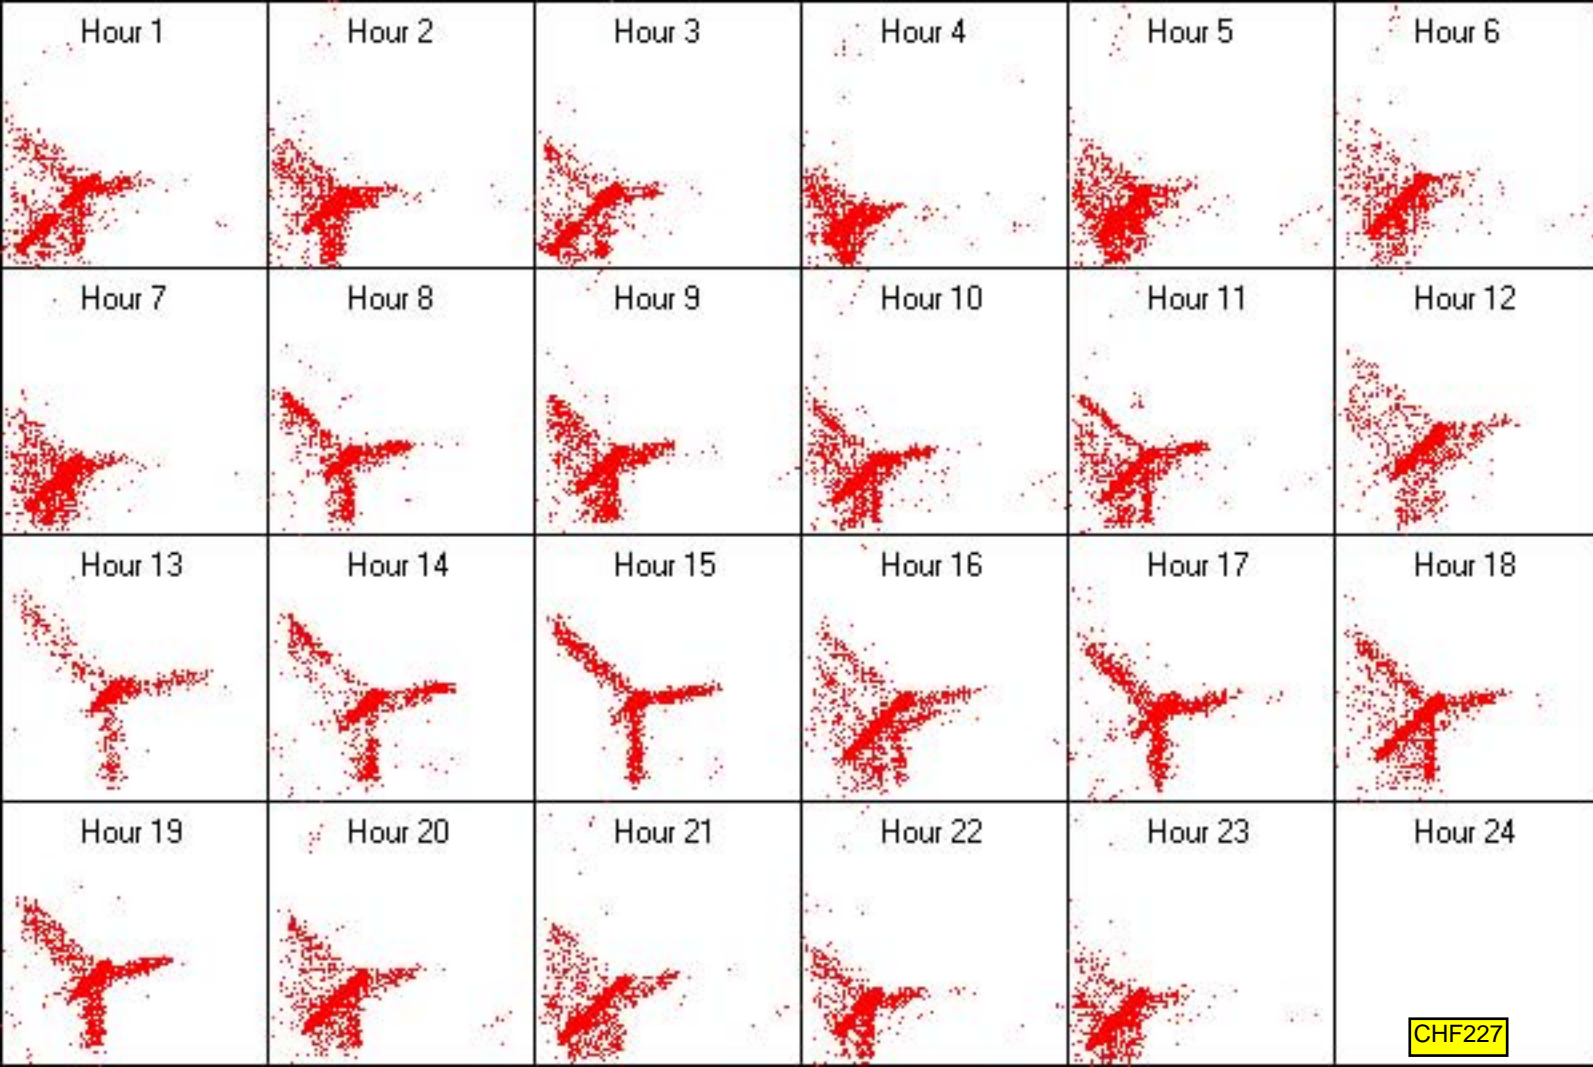

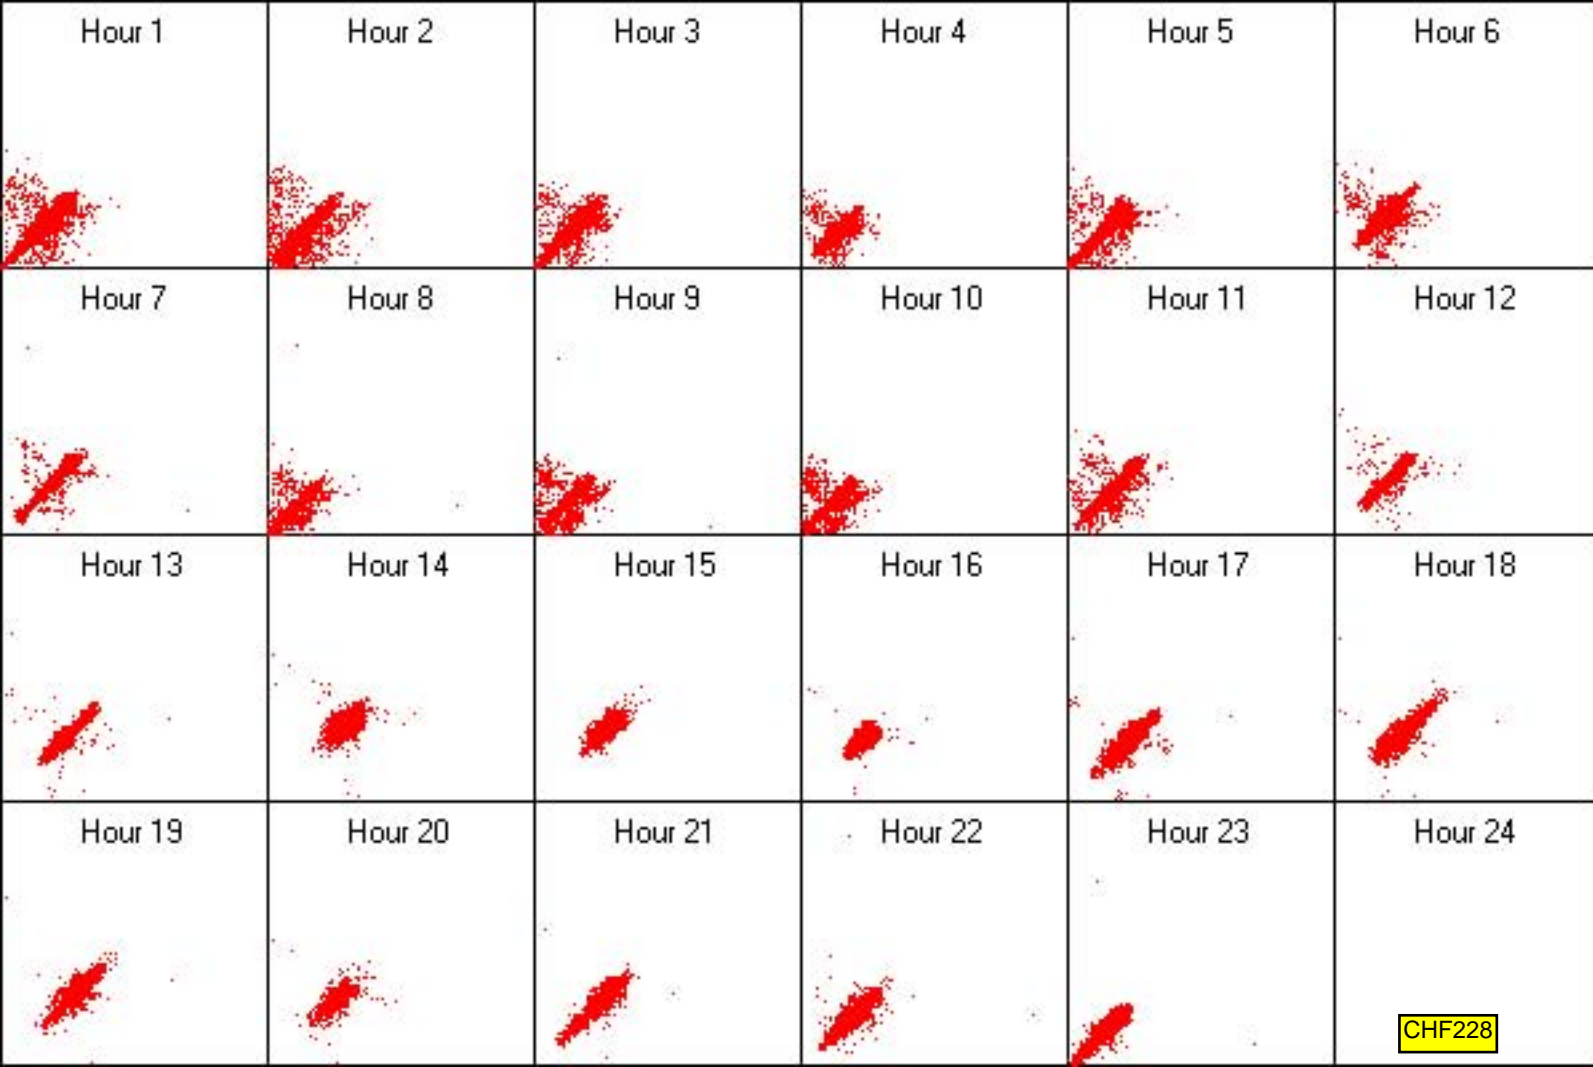

CHF228

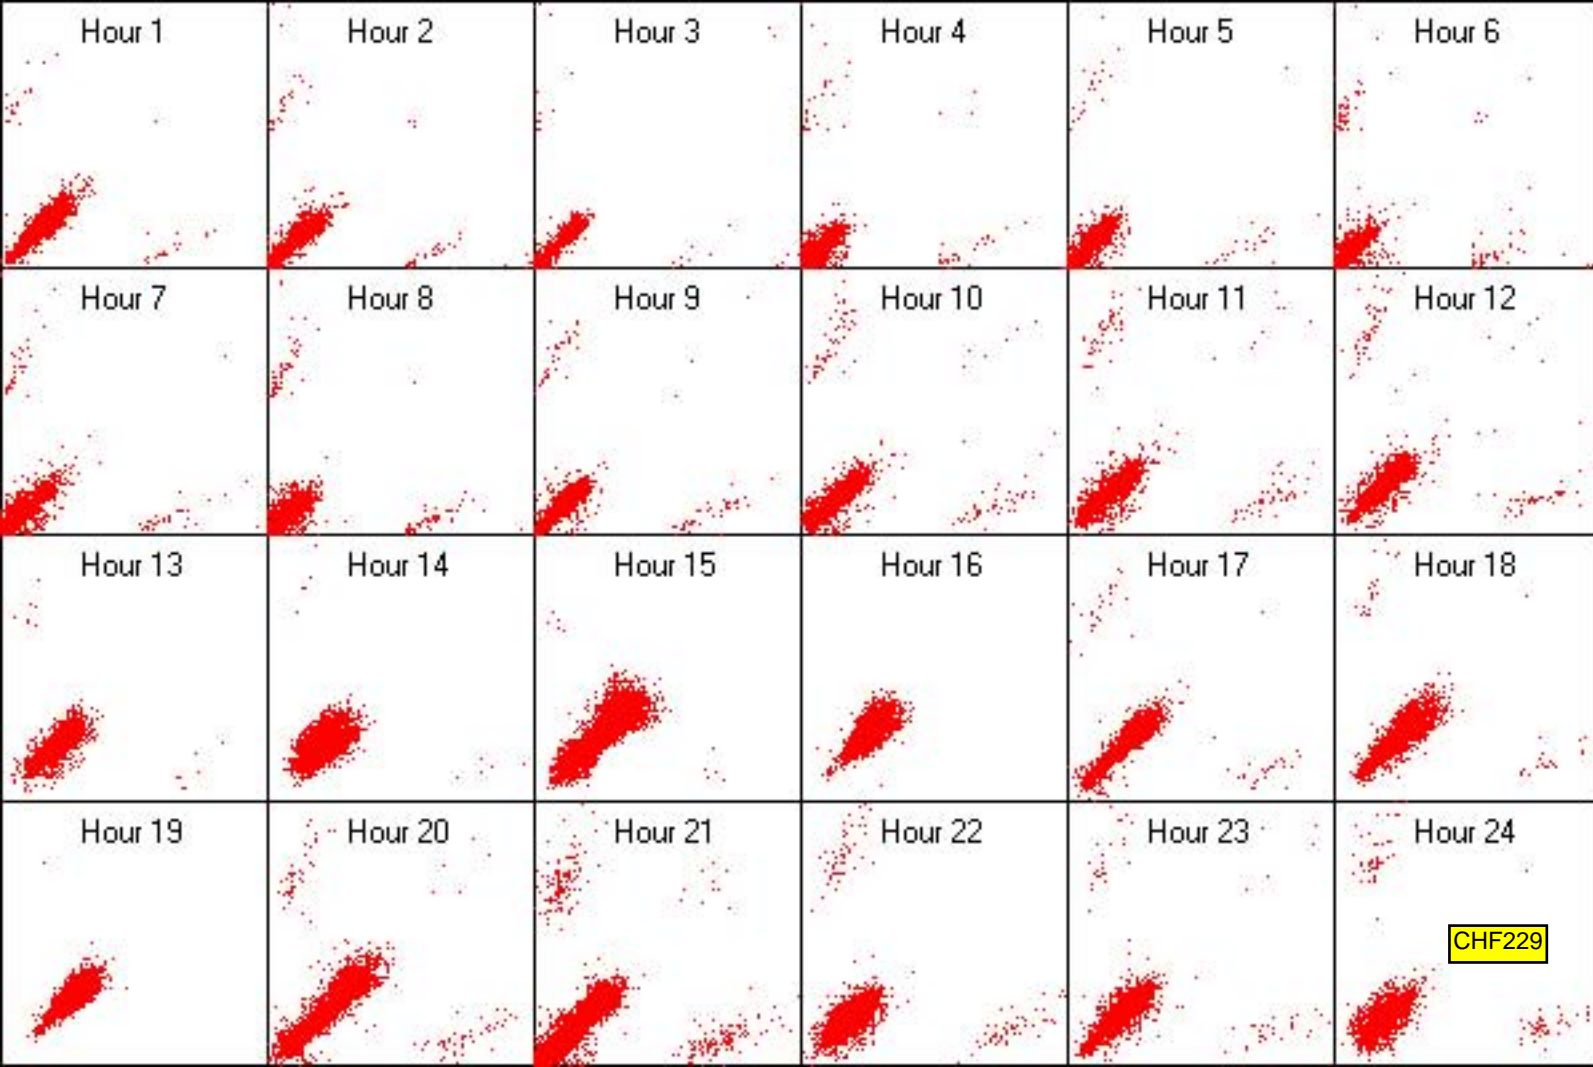

Supplement: MOESM2 [file 9431054]
